# Supplementary material for: Adaptor protein 2 sigma subunit (AP2S1) variants associated with neurodevelopmental disorders
Source: bioRxiv or medRxiv preprint supplement (doi:10.1101/2024.07.22.24310683), 2024-07-22
Supplement: Supplementary file [file media-2.pdf]

| AP2S1 Variant | REVEL score | CADD score | Source            |
|---------------|-------------|------------|-------------------|
| R10W          | 0.471       | 32.0       | GeneDx            |
| R10Q          | 0.273       | 28.5       | GeneDx, DiscovEHR |
| K18E          | 0.699       | 30.0       | Genomics England  |
| K18N          | 0.673       | 27.0       | GeneDx            |
| R61H          | 0.447       | 29.8       | GeneDx            |

**Supplementary Table 1.** Computational analysis of AP2 $\sigma$ 2 variants using Rare Exome Variant Ensemble Learner (REVEL) and Combined Annotation Dependent Deletion (CADD). REVEL scores are based on a combination of scores from 13 tools (MutPred, FATHMM v2.3, VEST 3.0, PolyPhen-2, SIFT, PROVEAN, Mutation Assessor, MutationTaster, LRT, GERP++, SiPhy, phyloP and phastCons) (Ioannidis et al. *Am. J. Hum. Genet.* 2016 99:877-885). Scores range from 0 to 1 with higher scores reflecting a greater likelihood that the variant is disease-causing. 75.4% of disease mutations but only 10.9% of neutral variants have a REVEL score >0.5. CADD scores are based on genomic features from surrounding sequence context, gene model annotations, evolutionary constraint, epigenetic measurements and functional predictions (Kircher et al. 2014 *Nat. Genet.* 46:310-315). The higher the CADD score the more the variant is predicted to be deleterious. Thus, variants with CADD scores >10, >20 and >30 are predicted to be among the 10%, 1% and 0.1% most deleterious possible substitutions in the human genome.
