# Supplementary material for: Adaptor protein 2 sigma subunit (AP2S1) variants associated with neurodevelopmental disorders
Source: bioRxiv or medRxiv preprint supplement (doi:10.1101/2024.07.22.24310683), 2024-07-22
Supplement: Supplementary file [file media-3.pdf]

| AP2S1 WT                 |                                    |       |     |        |          |        |      |          |   |                       |                                          |  |
|--------------------------|------------------------------------|-------|-----|--------|----------|--------|------|----------|---|-----------------------|------------------------------------------|--|
| Protein Accession        | Peptide                            | Start | End | -10lgP | Mass     | Length | ppm  | m/z      | z | PTM                   | AScore                                   |  |
| Q00000 HA-AP2S1 WT_HUMAN | R.F(+224.15)ILIQNR.A               | 4     | 10  | 36.06  | 1126.686 | 7      | -0.1 | 564.3503 | 2 | TMT                   | F1:TMT:1000.00                           |  |
| Q00000 HA-AP2S1 WT_HUMAN | R.FILIQNRAGK(+224.15)TR.L          | 4     | 15  | 25.31  | 1639.989 | 12     | -1.3 | 547.6694 | 3 | TMT                   | K10:TMT:62.82                            |  |
| Q00000 HA-AP2S1 WT_HUMAN | R.LAK(+224.15)WYMQFDDDD.E          | 16    | 26  | 56.57  | 1654.77  | 11     | -2.4 | 828.3904 | 2 | TMT                   | K3:TMT:11.10                             |  |
| Q00000 HA-AP2S1 WT_HUMAN | R.L(+224.15)AKWYIM(+15.99)QFDDDD.E | 16    | 26  | 46.53  | 1670.765 | 11     | -1.2 | 836.3888 | 2 | TMT; Oxidation (M)    | L1:TMT:0.00;M6:Oxidation (M):1000.00     |  |
| Q00000 HA-AP2S1 WT_HUMAN | R.D(+224.15)AKHTNFVEFR.N           | 43    | 53  | 73.05  | 1586.82  | 11     | 0.1  | 529.9474 | 3 | TMT                   | D1:TMT:22.85                             |  |
| Q00000 HA-AP2S1 WT_HUMAN | R.D(+224.15)AKHTNFVEFR.R           | 43    | 52  | 34.02  | 1430.719 | 10     | -3.5 | 716.3644 | 2 | TMT                   | D1:TMT:8.22                              |  |
| Q00000 HA-AP2S1 WT_HUMAN | R.DAK(+224.15)HTN(+.98)FVEFR.N     | 43    | 53  | 66.38  | 1587.804 | 11     | -3.1 | 530.2738 | 3 | TMT; Deamidation (NQ) | K3:TMT:14.04;N6:Deamidation (NQ):1000.00 |  |
| Q00000 HA-AP2S1 WT_HUMAN | R.NFK(+224.15)IYR.R                | 54    | 60  | 38.06  | 1176.702 | 7      | -1.6 | 589.3573 | 2 | TMT                   | K3:TMT:39.76                             |  |
| Q00000 HA-AP2S1 WT_HUMAN | R.N(+.98)(+224.15)FKIYR.R          | 54    | 60  | 25.57  | 1177.686 | 7      | -1.7 | 589.8492 | 2 | Deamidation (NQ); TMT | N1:Deamidation (NQ):1000.00;N1:TMT:0.00  |  |
| Q00000 HA-AP2S1 WT_HUMAN | R.ETSQTK(+224.15)VLK(+224.15)QLL.M | 125   | 136 | 45.16  | 1835.113 | 12     | 1    | 612.7123 | 3 | TMT                   | K6:TMT:39.44;K9:TMT:77.91                |  |
| Q00000 HA-AP2S1 WT_HUMAN | R.ETSQTK(+224.15)VLK.Q             | 125   | 133 | 46.18  | 1256.734 | 9      | 0.3  | 629.3745 | 2 | TMT                   | K6:TMT:22.69                             |  |

  

| AP2S1 R10W                 |                                    |       |     |        |          |        |      |          |   |                       |                                         |  |
|----------------------------|------------------------------------|-------|-----|--------|----------|--------|------|----------|---|-----------------------|-----------------------------------------|--|
| Protein Accession          | Peptide                            | Start | End | -10lgP | Mass     | Length | ppm  | m/z      | z | PTM                   | AScore                                  |  |
| Q00001 HA-AP2S1 R10W_HUMAN | R.FILIQNWAGK(+224.15)TR.L          | 4     | 15  | 58.93  | 1669.967 | 12     | -1.1 | 835.9897 | 2 | TMT                   | K10:TMT:181.94                          |  |
| Q00001 HA-AP2S1 R10W_HUMAN | R.L(+224.15)AKWYMQFDDDD.E          | 16    | 26  | 43.37  | 1654.77  | 11     | 0.5  | 828.3928 | 2 | TMT                   | L1:TMT:0.00                             |  |
| Q00001 HA-AP2S1 R10W_HUMAN | R.DAK(+224.15)HT(+79.96)NFVEFR.N   | 43    | 53  | 74.34  | 1666.777 | 11     | 0.9  | 556.6002 | 3 | TMT; Sulfation        | K3:TMT:8.22;T5:Sulfation:1000.00        |  |
| Q00001 HA-AP2S1 R10W_HUMAN | R.D(+224.15)AKHT(+79.96)NFVEFR.N   | 43    | 53  | 70.15  | 1666.777 | 11     | 0.9  | 556.6002 | 3 | TMT; Sulfation        | D1:TMT:0.00;T5:Sulfation:1000.00        |  |
| Q00001 HA-AP2S1 R10W_HUMAN | R.D(+224.15)AKHTNFVEFR.N           | 43    | 53  | 68.29  | 1586.82  | 11     | -0.4 | 529.9472 | 3 | TMT                   | D1:TMT:14.04                            |  |
| Q00001 HA-AP2S1 R10W_HUMAN | R.DAK(+224.15)HTN(+.98)FVEFR.N     | 43    | 53  | 42.32  | 1587.804 | 11     | 3.4  | 530.2772 | 3 | TMT; Deamidation (NQ) | K3:TMT:0.00;N6:Deamidation (NQ):1000.00 |  |
| Q00001 HA-AP2S1 R10W_HUMAN | R.N(+224.15)FKIYR.R                | 54    | 60  | 22.03  | 1176.702 | 7      | -4.9 | 393.2393 | 3 | TMT                   | N1:TMT:24.32                            |  |
| Q00001 HA-AP2S1 R10W_HUMAN | R.NFK(+224.15)IYR.R                | 54    | 60  | 35.87  | 1176.702 | 7      | -0.9 | 589.3577 | 2 | TMT                   | K3:TMT:36.05                            |  |
| Q00001 HA-AP2S1 R10W_HUMAN | R.ETSQTK(+224.15)VLK(+224.15)QLL.M | 125   | 136 | 39.05  | 1835.113 | 12     | 3.8  | 612.714  | 3 | TMT                   | K6:TMT:45.16;K9:TMT:81.34               |  |

**Supplementary Table 2.** Table indicating the AScore (confidence in localisation) of all the peptides that were identified in carrying a TMT0 label. Unhighlighted rows indicate peptides containing TMT0 labelled lysine residues. Yellow highlighted rows indicate non-lysine TMT0 labelled residues that have an AScore >20 and thus meet the confidence level set for localisation; such residues could represent N-termini. Grey highlighted rows indicate non-lysine TMT0 labelled residues that have an AScore <20 and thus there is not enough evidence in terms of the number of MS fragment ions for the software to confidently assign the TMT0 label to the residue.
