# Supplementary material for: Adaptor protein 2 sigma subunit (AP2S1) variants associated with neurodevelopmental disorders
Source: bioRxiv or medRxiv preprint supplement (doi:10.1101/2024.07.22.24310683), 2024-07-22
Supplement: Supplementary file [file media-4.pdf]

| Accession                                                                                                                                                                                          | Peptide count | Unique peptides | Anova (p) | Max fold change | Highest Mean Condition | Lowest Mean Condition | Description                                                                      |
|----------------------------------------------------------------------------------------------------------------------------------------------------------------------------------------------------|---------------|-----------------|-----------|-----------------|------------------------|-----------------------|----------------------------------------------------------------------------------|
| P46379 BAG6_HUMAN                                                                                                                                                                                  | 3             | 3               | 0.00095   | 3.854           | R10W                   | WT                    | Large proline-rich protein BAG6 GN=BAG6                                          |
| P35268 RL22_HUMAN                                                                                                                                                                                  | 3             | 3               | 0.00146   | 1.281           | R10W                   | WT                    | 60S ribosomal protein L22 GN=RPL22                                               |
| Q13200 PSMD2_HUMAN                                                                                                                                                                                 | 5             | 5               | 0.00197   | 2.064           | R10W                   | WT                    | 26S proteasome non-ATPase regulatory subunit 2 GN=PSMD2                          |
| P11274 BCR_HUMAN                                                                                                                                                                                   | 1             | 1               | 0.00210   | 1.458           | R10W                   | WT                    | Breakpoint cluster region protein GN=BCR                                         |
| Q15008 PSMD6_HUMAN                                                                                                                                                                                 | 2             | 2               | 0.00261   | 1.562           | R10W                   | WT                    | 26S proteasome non-ATPase regulatory subunit 6 GN=PSMD6                          |
| Q6UB35 C1TM_HUMAN                                                                                                                                                                                  | 2             | 2               | 0.00390   | 1.252           | WT                     | R10W                  | Monofunctional C1-tetrahydrofolate synthase, mitochondrial GN=MTHFD1L            |
| P11940 PABP1_HUMAN                                                                                                                                                                                 | 3             | 3               | 0.00539   | 1.177           | WT                     | R10W                  | Polyadenylate-binding protein 1 GN=PABPC1                                        |
| O00203 AP3B1_HUMAN                                                                                                                                                                                 | 1             | 1               | 0.00619   | 2.168           | WT                     | R10W                  | AP-3 complex subunit beta-1 GN=AP3B1                                             |
| Q13501 SQSTM_HUMAN                                                                                                                                                                                 | 1             | 1               | 0.00721   | 13.257          | R10W                   | WT                    | Sequestosome-1 GN=SQSTM1                                                         |
| P50402 EMD_HUMAN                                                                                                                                                                                   | 2             | 2               | 0.00843   | 2.223           | R10W                   | WT                    | Emerin GN=EMD                                                                    |
| O95816 BAG2_HUMAN                                                                                                                                                                                  | 6             | 6               | 0.00869   | 2.353           | R10W                   | WT                    | BAG family molecular chaperone regulator 2 GN=BAG2                               |
| P05787 K2C8_HUMAN                                                                                                                                                                                  | 10            | 7               | 0.00882   | 1.958           | R10W                   | WT                    | Keratin, type II cytoskeletal 8 GN=KRT8                                          |
| O00487 PSDE_HUMAN                                                                                                                                                                                  | 2             | 2               | 0.00904   | 2.061           | R10W                   | WT                    | 26S proteasome non-ATPase regulatory subunit 14 GN=PSMD14                        |
| Q9UN37 VPS4A_HUMAN                                                                                                                                                                                 | 3             | 3               | 0.01335   | 1.428           | R10W                   | WT                    | Vacuolar protein sorting-associated protein 4A GN=VPS4A                          |
| O95782 AP2A1_HUMAN                                                                                                                                                                                 | 154           | 103             | 0.01362   | 1.642           | WT                     | R10W                  | AP-2 complex subunit alpha-1 GN=AP2A1                                            |
| Q0JRZ9 FCHO2_HUMAN                                                                                                                                                                                 | 11            | 11              | 0.01444   | 2.070           | WT                     | R10W                  | F-BAR domain only protein 2 GN=FCHO2                                             |
| P11142 HSP7C_HUMAN                                                                                                                                                                                 | 75            | 27              | 0.01621   | 1.421           | R10W                   | WT                    | Heat shock cognate 71 kDa protein GN=HSPA8                                       |
| Q15811 ITSN1_HUMAN                                                                                                                                                                                 | 4             | 4               | 0.01646   | 2.564           | WT                     | R10W                  | Intersectin-1 GN=ITSN1                                                           |
| P10768 ESTD_HUMAN                                                                                                                                                                                  | 34            | 33              | 0.01695   | 1.557           | WT                     | R10W                  | S-formylglutathione hydrolase GN=ESD                                             |
| P21333 FLNA_HUMAN                                                                                                                                                                                  | 41            | 41              | 0.01810   | 1.273           | R10W                   | WT                    | Filamin-A GN=FLNA                                                                |
| Q9UBS4 DJB11_HUMAN                                                                                                                                                                                 | 5             | 5               | 0.01877   | 1.534           | R10W                   | WT                    | DnaJ homolog subfamily B member 11 GN=DNAJB11                                    |
| Q13148 TADBP_HUMAN                                                                                                                                                                                 | 1             | 1               | 0.01917   | 1.791           | R10W                   | WT                    | TAR DNA-binding protein 43 GN=TARDBP                                             |
| Q96D71 REPS1_HUMAN                                                                                                                                                                                 | 15            | 15              | 0.02002   | 1.914           | WT                     | R10W                  | RalBP1-associated Eps domain-containing protein 1 GN=REPS1                       |
| Q14257 RCN2_HUMAN                                                                                                                                                                                  | 16            | 16              | 0.02159   | 1.677           | R10W                   | WT                    | Reticulocalbin-2 GN=RCN2                                                         |
| Q08211 DHX9_HUMAN                                                                                                                                                                                  | 2             | 2               | 0.02177   | 1.586           | R10W                   | WT                    | ATP-dependent RNA helicase A GN=DHX9                                             |
| Q9NSY1 BMP2K_HUMAN                                                                                                                                                                                 | 31            | 29              | 0.02204   | 3.251           | WT                     | R10W                  | BMP-2-inducible protein kinase GN=BMP2K                                          |
| Q99615 DNJC7_HUMAN                                                                                                                                                                                 | 4             | 4               | 0.02349   | 1.342           | R10W                   | WT                    | DnaJ homolog subfamily C member 7 GN=DNJC7                                       |
| P09543 CNP37_HUMAN                                                                                                                                                                                 | 1             | 1               | 0.02424   | 1.367           | R10W                   | WT                    | 2',3'-cyclic-nucleotide 3'-phosphodiesterase GN=CNP                              |
| P40227 TCPZ_HUMAN                                                                                                                                                                                  | 5             | 5               | 0.02523   | 1.327           | R10W                   | WT                    | T-complex protein 1 subunit zeta GN=CCT6A                                        |
| Q9Y5V3 MAGD1_HUMAN                                                                                                                                                                                 | 1             | 1               | 0.02531   | 1.985           | R10W                   | WT                    | Melanoma-associated antigen D1 GN=MAGED1                                         |
| Q96CS3 FAF2_HUMAN                                                                                                                                                                                  | 5             | 5               | 0.02531   | 1.817           | R10W                   | WT                    | FAS-associated factor 2 GN=FAF2                                                  |
| P62191 PRS4_HUMAN                                                                                                                                                                                  | 3             | 2               | 0.02558   | 1.482           | R10W                   | WT                    | 26S proteasome regulatory subunit 4 GN=PSMC1                                     |
| Q7Z7L1 SLN11_HUMAN                                                                                                                                                                                 | 7             | 6               | 0.02982   | 1.370           | R10W                   | WT                    | Schlafen family member 11 GN=SLFN11                                              |
| P49454 CENPF_HUMAN                                                                                                                                                                                 | 1             | 1               | 0.03358   | 1.358           | R10W                   | WT                    | Centromere protein F GN=CENPF                                                    |
| Q9BV29 CCDC32_HUMAN                                                                                                                                                                                | 3             | 3               | 0.03632   | 3.171           | WT                     | R10W                  | Coiled-coil domain-containing protein 32 GN=CCDC32                               |
| Q9UDX4 S14L3_HUMAN                                                                                                                                                                                 | 1             | 1               | 0.03874   | 2.040           | R10W                   | WT                    | SEC14-like protein 3 GN=SEC14L3                                                  |
| Q9HA64 KT3K_HUMAN                                                                                                                                                                                  | 2             | 2               | 0.03887   | 7.488           | WT                     | R10W                  | Ketosamine-3-kinase GN=FN3KRP                                                    |
| P13797 PLST_HUMAN                                                                                                                                                                                  | 1             | 1               | 0.04000   | 3.248           | R10W                   | WT                    | Plastin-3 GN=PLS3                                                                |
| P49757 NUMB_HUMAN                                                                                                                                                                                  | 4             | 4               | 0.04198   | 1.521           | WT                     | R10W                  | Protein numb homolog GN=NUMB                                                     |
| A0A0A0MS14 HV145_HUMAN;A0A0B4J2H0 HV69D_HUMAN;A0A0C4DH29 HV103_HUMAN;A0A0C4DH33 HV124_HUMAN;A0A0C4DH39 HV158_HUMAN;A0A0G2JMI3 HV692_HUMAN;P01742 HV169_HUMAN;P01743 HV146_HUMAN;P0DP01 HV108_HUMAN | 1             | 1               | 0.04328   | 2.488           | R10W                   | WT                    | Immunoglobulin heavy variable 1-45 GN=IGHV1-45                                   |
| P63010 AP2B1_HUMAN                                                                                                                                                                                 | 232           | 174             | 0.04467   | 1.533           | WT                     | R10W                  | AP-2 complex subunit beta GN=AP2B1                                               |
| Q00325 MPCP_HUMAN                                                                                                                                                                                  | 7             | 7               | 0.04519   | 1.554           | R10W                   | WT                    | Phosphate carrier protein, mitochondrial GN=SLC25A3                              |
| Q9Y6N1 COX11_HUMAN                                                                                                                                                                                 | 1             | 1               | 0.04663   | 1.553           | R10W                   | WT                    | Cytochrome c oxidase assembly protein COX11, mitochondrial GN=COX11              |
| P52466 NEC2_HHV7J                                                                                                                                                                                  | 1             | 1               | 0.04817   | 2.765           | R10W                   | WT                    | Nuclear egress protein 2 OS=Human herpesvirus 7 (strain JI) OX=57278 GN=NEC2     |
| Q6YN16 HSDL2_HUMAN                                                                                                                                                                                 | 3             | 3               | 0.04897   | 1.486           | WT                     | R10W                  | Hydroxysteroid dehydrogenase-like protein 2 GN=HSDL2                             |
| Q00000 HA-AP2_HUMAN                                                                                                                                                                                | 35            | 3               | 0.04993   | 1.732           | WT                     | R10W                  | GN=HA-AP2                                                                        |
| Q00001 HA-AP2-R10W_HUMAN                                                                                                                                                                           | 34            | 2               | 0.04993   | 1.732           | WT                     | R10W                  | GN=HA-AP2                                                                        |
| P63104 1433Z_HUMAN                                                                                                                                                                                 | 7             | 3               | 0.05176   | 1.649           | WT                     | R10W                  | 14-3-3 protein zeta/delta GN=YWHAZ                                               |
| P62333 PRS10_HUMAN                                                                                                                                                                                 | 2             | 1               | 0.05425   | 2.042           | R10W                   | WT                    | 26S proteasome regulatory subunit 10B GN=PSMC6                                   |
| P17980 PRS6A_HUMAN                                                                                                                                                                                 | 1             | 1               | 0.05480   | 2.283           | R10W                   | WT                    | 26S proteasome regulatory subunit 6A GN=PSMC3                                    |
| O75643 U520_HUMAN                                                                                                                                                                                  | 1             | 1               | 0.05523   | 1.839           | R10W                   | WT                    | U5 small nuclear ribonucleoprotein 200 kDa helicase GN=SNRNP200                  |
| P60953 CDC42_HUMAN                                                                                                                                                                                 | 1             | 1               | 0.05704   | 1.279           | WT                     | R10W                  | Cell division control protein 42 homolog GN=CDC42                                |
| P04844 RPN2_HUMAN                                                                                                                                                                                  | 3             | 3               | 0.05714   | 1.444           | R10W                   | WT                    | Dolichyl-diphosphooligosaccharide--protein glycosyltransferase subunit 2 GN=RPN2 |
| P12236 ADT3_HUMAN                                                                                                                                                                                  | 17            | 1               | 0.05999   | 1.465           | R10W                   | WT                    | ADP/ATP translocase 3 GN=SLC25A6                                                 |

|                                                        |                                      |     |    |         |       |      |      |                                                                                         |
|--------------------------------------------------------|--------------------------------------|-----|----|---------|-------|------|------|-----------------------------------------------------------------------------------------|
|                                                        | P49368 TCPG_HUMAN                    | 9   | 8  | 0.06274 | 1.622 | R10W | WT   | T-complex protein 1 subunit gamma GN=CCT3                                               |
|                                                        | P62195 PRS8_HUMAN                    | 5   | 4  | 0.06291 | 1.282 | R10W | WT   | 26S proteasome regulatory subunit 8 GN=PSMC5                                            |
|                                                        | O75815 BCAR3_HUMAN                   | 2   | 2  | 0.06397 | 1.491 | R10W | WT   | Breast cancer anti-estrogen resistance protein 3 GN=BCAR3                               |
|                                                        | O43242 PSMD3_HUMAN                   | 4   | 4  | 0.06727 | 1.979 | R10W | WT   | 26S proteasome non-ATPase regulatory subunit 3 GN=PSMD3                                 |
| O14950 ML12B_HUMAN;P19105 ML12A_HUMAN                  | Q726Z7 HUWE1_HUMAN                   | 2   | 2  | 0.06874 | 1.943 | R10W | WT   | Myosin regulatory light chain 12B GN=MYL12B                                             |
|                                                        | P30041 PRDX6_HUMAN                   | 1   | 1  | 0.06930 | 1.681 | R10W | WT   | Peroxisomal protein 6 GN=PRDX6                                                          |
|                                                        | Q86X55 CARM1_HUMAN                   | 1   | 1  | 0.06970 | 2.395 | WT   | R10W | Histone-arginine methyltransferase CARM1 GN=CARM1                                       |
|                                                        | P21964 COMT_HUMAN                    | 18  | 18 | 0.07107 | 1.989 | R10W | WT   | E3 ubiquitin-protein ligase HUWE1 GN=HUWE1                                              |
|                                                        | Q7L8L6 FAKD5_HUMAN                   | 1   | 1  | 0.07158 | 1.393 | R10W | WT   | Catechol O-methyltransferase GN=COMT                                                    |
|                                                        | P35637 FUS_HUMAN                     | 1   | 1  | 0.07261 | 1.648 | R10W | WT   | FAST kinase domain-containing protein 5, mitochondrial GN=FASTKD5                       |
|                                                        | Q9P2R7 SUCB1_HUMAN                   | 1   | 1  | 0.07319 | 1.986 | R10W | WT   | RNA-binding protein FUS GN=FUS                                                          |
|                                                        | Q9H4B7 TBB1_HUMAN                    | 3   | 3  | 0.07385 | 1.435 | R10W | WT   | Succinate--CoA ligase [ADP-forming] subunit beta, mitochondrial GN=SUCLA2               |
|                                                        | P17812 PYRG1_HUMAN                   | 47  | 1  | 0.07407 | 2.625 | R10W | WT   | Tubulin beta-1 chain GN=TUBB1                                                           |
|                                                        | P49411 EFTU_HUMAN                    | 4   | 4  | 0.07632 | 1.073 | WT   | R10W | CTP synthase 1 GN=CTPS1                                                                 |
|                                                        | P50990 TCPQ_HUMAN                    | 34  | 34 | 0.07817 | 1.200 | R10W | WT   | Elongation factor Tu, mitochondrial GN=TUFM                                             |
|                                                        | Q99460 PSMD1_HUMAN                   | 23  | 22 | 0.07886 | 1.435 | WT   | R10W | T-complex protein 1 subunit theta GN=CCT8                                               |
|                                                        | Q6PD74 AAGAB_HUMAN                   | 3   | 3  | 0.07975 | 1.293 | R10W | WT   | 26S proteasome non-ATPase regulatory subunit 1 GN=PSMD1                                 |
| P01889 HLAB_HUMAN;P17693 HLAG_HUMAN                    | P24311 COX7B_HUMAN                   | 34  | 34 | 0.08130 | 1.294 | WT   | R10W | Alpha- and gamma-adaptin-binding protein p34 GN=AAGAB                                   |
|                                                        | A6NEC2 PSAL_HUMAN;P55786 PSA_HUMAN   | 1   | 1  | 0.08157 | 1.768 | R10W | WT   | HLA class I histocompatibility antigen, B alpha chain GN=HLA-B                          |
|                                                        | Q9BS26 ERP44_HUMAN                   | 1   | 1  | 0.08199 | 1.675 | R10W | WT   | Cytochrome c oxidase subunit 7B, mitochondrial GN=COX7B                                 |
|                                                        | P24534 EF1B_HUMAN                    | 1   | 1  | 0.08402 | 2.076 | R10W | WT   | Puromycin-sensitive aminopeptidase-like protein GN=NPEPSSL1                             |
|                                                        | Q07666 KHDR1_HUMAN                   | 1   | 1  | 0.08722 | 1.169 | R10W | WT   | Endoplasmic reticulum resident protein 44 GN=ERP44                                      |
|                                                        | Q9NVZ3 NECP2_HUMAN                   | 7   | 6  | 0.09054 | 2.003 | R10W | WT   | Elongation factor 1-beta GN=EEF1B2                                                      |
|                                                        | P36542 ATPG_HUMAN                    | 1   | 1  | 0.09144 | 2.171 | R10W | WT   | KH domain-containing, RNA-binding, signal transduction-associated protein 1 GN=KHDRBS1  |
|                                                        | P48643 TCPE_HUMAN                    | 34  | 30 | 0.09310 | 1.392 | WT   | R10W | Adaptin ear-binding coat-associated protein 2 GN=NECAP2                                 |
|                                                        | Q9UBP9 GULP1_HUMAN                   | 1   | 1  | 0.09356 | 1.869 | R10W | WT   | ATP synthase subunit gamma, mitochondrial GN=ATP5F1C                                    |
|                                                        | P12004 PCNA_HUMAN                    | 20  | 19 | 0.09449 | 1.418 | R10W | WT   | T-complex protein 1 subunit epsilon GN=CCT5                                             |
|                                                        | O76003 GLRX3_HUMAN                   | 1   | 1  | 0.09491 | 1.525 | WT   | R10W | PTB domain-containing engulfment adapter protein 1 GN=GULP1                             |
|                                                        | P00736 C1R_HUMAN                     | 15  | 15 | 0.09503 | 1.200 | R10W | WT   | Proliferating cell nuclear antigen GN=PCNA                                              |
|                                                        | P04406 G3P_HUMAN                     | 1   | 1  | 0.09815 | 1.408 | R10W | WT   | Glutaredoxin-3 GN=GLRX3                                                                 |
|                                                        | Q9Y314 NOSIP_HUMAN                   | 2   | 2  | 0.09817 | 1.173 | WT   | R10W | Complement C1r subcomponent GN=C1R                                                      |
|                                                        | P12235 ADT1_HUMAN                    | 35  | 33 | 0.09903 | 1.185 | R10W | WT   | Glyceraldehyde-3-phosphate dehydrogenase GN=GAPDH                                       |
|                                                        | P60842 IF4A1_HUMAN                   | 1   | 1  | 0.10061 | 1.558 | WT   | R10W | Nitric oxide synthase-interacting protein GN=NOSIP                                      |
|                                                        | Q53GQ0 DHB12_HUMAN                   | 13  | 1  | 0.10812 | 1.523 | R10W | WT   | ADP/ATP translocase 1 GN=SLC25A4                                                        |
|                                                        | P09496 CLCA_HUMAN                    | 11  | 10 | 0.11124 | 1.359 | R10W | WT   | Eukaryotic initiation factor 4A-I GN=EIF4A1                                             |
|                                                        | O94973 AP2A2_HUMAN                   | 1   | 1  | 0.11565 | 1.422 | R10W | WT   | Very-long-chain 3-oxoacyl-CoA reductase GN=HSD17B12                                     |
|                                                        | P62258 1433E_HUMAN                   | 1   | 1  | 0.11609 | 1.836 | WT   | R10W | Clathrin light chain A GN=CLTA                                                          |
|                                                        | P05141 ADT2_HUMAN                    | 124 | 70 | 0.11783 | 1.327 | WT   | R10W | AP-2 complex subunit alpha-2 GN=AP2A2                                                   |
|                                                        | Q15393 SF3B3_HUMAN                   | 8   | 4  | 0.11824 | 1.265 | R10W | WT   | 14-3-3 protein epsilon GN=YWHAE                                                         |
|                                                        | P50914 RL14_HUMAN                    | 20  | 3  | 0.12010 | 1.318 | R10W | WT   | ADP/ATP translocase 2 GN=SLC25A5                                                        |
|                                                        | Q9UJY1 HSPB8_HUMAN                   | 2   | 2  | 0.12070 | 1.458 | R10W | WT   | Splicing factor 3B subunit 3 GN=SF3B3                                                   |
| P63122 VPK8_HUMAN;P63125 VPK25_HUMAN;P63128 POK9_HUMAN | Q9Y314 NOSIP_HUMAN                   | 1   | 1  | 0.12280 | 1.512 | R10W | WT   | 60S ribosomal protein L14 GN=RPL14                                                      |
|                                                        | P60660 MYL6_HUMAN                    | 3   | 3  | 0.12533 | 1.277 | R10W | WT   | Heat shock protein beta-8 GN=HSPB8                                                      |
|                                                        | P12956 XRCC6_HUMAN                   | 1   | 1  | 0.12627 | 1.138 | R10W | WT   | Endogenous retrovirus group K member 8 Pro protein GN=ERVK-8                            |
|                                                        | P52272 HNRPM_HUMAN                   | 4   | 4  | 0.12736 | 1.631 | R10W | WT   | Myosin light polypeptide 6 GN=MYL6                                                      |
|                                                        | O00151 PDL1_HUMAN                    | 6   | 6  | 0.12749 | 1.359 | R10W | WT   | X-ray repair cross-complementing protein 6 GN=XRCC6                                     |
|                                                        | P08559 ODPA_HUMAN                    | 7   | 7  | 0.12883 | 1.182 | R10W | WT   | Heterogeneous nuclear ribonucleoprotein M GN=HNRNPM                                     |
|                                                        | Q99714 HCD2_HUMAN                    | 1   | 1  | 0.13297 | 1.621 | R10W | WT   | PDZ and LIM domain protein 1 GN=PDLIM1                                                  |
|                                                        | P27797 CALR_HUMAN                    | 1   | 1  | 0.13320 | 1.519 | R10W | WT   | Pyruvate dehydrogenase E1 component subunit alpha, somatic form, mitochondrial GN=PDHA1 |
|                                                        | Q15084 PDIA6_HUMAN                   | 2   | 2  | 0.14188 | 1.265 | R10W | WT   | 3-hydroxyacyl-CoA dehydrogenase type-2 GN=HSD17B10                                      |
|                                                        | P55084 ECHB_HUMAN                    | 1   | 1  | 0.14458 | 1.457 | WT   | R10W | Calreticulin GN=CALR                                                                    |
|                                                        | P53634 CATC_HUMAN                    | 5   | 5  | 0.14740 | 1.282 | R10W | WT   | Protein disulfide-isomerase A6 GN=PDIA6                                                 |
|                                                        | P17844 DDX5_HUMAN;Q92841 DDX17_HUMAN | 1   | 1  | 0.14798 | 1.174 | R10W | WT   | Trifunctional enzyme subunit beta, mitochondrial GN=HADHB                               |
| A0A075B6R9 KV24_HUMAN;A0A0C4DH68 KV224_HUMAN           | Q9Y4W6 AFG32_HUMAN                   | 1   | 1  | 0.14926 | 1.543 | R10W | WT   | Dipeptidyl peptidase 1 GN=CTSC                                                          |
|                                                        | P00338 LDHA_HUMAN                    | 1   | 1  | 0.15173 | 1.299 | R10W | WT   | Probable ATP-dependent RNA helicase DDX5 GN=DDX5                                        |
|                                                        |                                      | 25  | 16 | 0.15201 | 1.116 | WT   | R10W | Probable non-functional immunoglobulin kappa variable 2D-24 GN=IGKV2D-24 PE=5           |
|                                                        |                                      | 2   | 1  | 0.15600 | 1.749 | R10W | WT   | AFG3-like protein 2 GN=AFG3L2                                                           |
|                                                        |                                      | 3   | 2  | 0.15651 | 1.800 | R10W | WT   | L-lactate dehydrogenase A chain GN=LDHA                                                 |

|                                                                        |     |    |         |        |      |      |                                                                                              |
|------------------------------------------------------------------------|-----|----|---------|--------|------|------|----------------------------------------------------------------------------------------------|
| P05109 S10A8_HUMAN                                                     | 1   | 1  | 0.15711 | 4.976  | WT   | R10W | Protein S100-A8 GN=S100A8                                                                    |
| Q13015 AF1Q_HUMAN                                                      | 1   | 1  | 0.15780 | 1.492  | R10W | WT   | Protein AF1q GN=MLLT11                                                                       |
| P31689 DNAJA1_HUMAN                                                    | 4   | 4  | 0.15844 | 1.409  | R10W | WT   | DnaJ homolog subfamily A member 1 GN=DNAJA1                                                  |
| O75616 ERAL1_HUMAN                                                     | 1   | 1  | 0.15934 | 1.302  | WT   | R10W | GTPase Era, mitochondrial GN=ERAL1                                                           |
| P62854 RS26_HUMAN;Q5JNZ5 RS26L_HUMAN                                   | 2   | 2  | 0.15937 | 1.271  | R10W | WT   | 40S ribosomal protein S26 GN=RPS26                                                           |
| Q9UKV5 AMFR_HUMAN                                                      | 1   | 1  | 0.16169 | 2.105  | R10W | WT   | E3 ubiquitin-protein ligase AMFR GN=AMFR                                                     |
| Q08J23 NSUN2_HUMAN                                                     | 1   | 1  | 0.16341 | 21.114 | R10W | WT   | RNA cytosine C(5)-methyltransferase NSUN2 GN=NSUN2                                           |
| P04083 ANXA1_HUMAN                                                     | 2   | 2  | 0.16421 | 1.821  | R10W | WT   | Annexin A1 GN=ANXA1                                                                          |
| P06312 KV401_HUMAN                                                     | 27  | 7  | 0.16485 | 1.301  | R10W | WT   | Immunoglobulin kappa variable 4-1 GN=IGKV4-1                                                 |
| Q9H853 TBA4B_HUMAN                                                     | 27  | 2  | 0.16533 | 1.725  | R10W | WT   | Putative tubulin-like protein alpha-4B GN=TUBA4B PE=5                                        |
| Q15942 ZYX_HUMAN                                                       | 12  | 12 | 0.16562 | 1.253  | R10W | WT   | Zyxin GN=ZYX                                                                                 |
| Q9GZP9 DERL2_HUMAN                                                     | 1   | 1  | 0.16593 | 2.041  | R10W | WT   | Derlin-2 GN=DERL2                                                                            |
| Q15311 RBP1_HUMAN                                                      | 3   | 3  | 0.17150 | 1.531  | WT   | R10W | RalA-binding protein 1 GN=RALBP1                                                             |
| Q3ZCQ8 TIM50_HUMAN                                                     | 15  | 15 | 0.17191 | 1.337  | R10W | WT   | Mitochondrial import inner membrane translocase subunit TIM50 GN=TIMM50                      |
| P14868 SYDC_HUMAN                                                      | 2   | 2  | 0.17450 | 1.623  | R10W | WT   | Aspartate--tRNA ligase, cytoplasmic GN=DARS1                                                 |
| Q86VP6 CAND1_HUMAN                                                     | 1   | 1  | 0.18279 | 1.504  | R10W | WT   | Cullin-associated NEDD8-dissociated protein 1 GN=CAND1                                       |
| Q9Y5X1 SNX9_HUMAN                                                      | 5   | 5  | 0.18352 | 1.429  | WT   | R10W | Sorting nexin-9 GN=SNX9                                                                      |
| P43686 PRS6B_HUMAN                                                     | 6   | 6  | 0.18536 | 1.284  | R10W | WT   | 26S proteasome regulatory subunit 6B GN=PSMC4                                                |
| P55072 TERA_HUMAN                                                      | 13  | 11 | 0.18550 | 1.873  | R10W | WT   | Transitional endoplasmic reticulum ATPase GN=VCP                                             |
| P46782 RS5_HUMAN                                                       | 2   | 1  | 0.18590 | 1.463  | R10W | WT   | 40S ribosomal protein S5 GN=RPS5                                                             |
| AOA087WSY4 HIV432_HUMAN                                                | 3   | 1  | 0.19182 | 1.270  | R10W | WT   | Immunoglobulin heavy variable 4-30-2 GN=IGHV4-30-2                                           |
| P07195 LDHB_HUMAN                                                      | 9   | 8  | 0.19383 | 1.173  | WT   | R10W | L-lactate dehydrogenase B chain GN=LDHB                                                      |
| P39023 RL3_HUMAN                                                       | 5   | 5  | 0.19711 | 1.174  | R10W | WT   | 60S ribosomal protein L3 GN=RPL3                                                             |
| Q13596 SNX1_HUMAN                                                      | 1   | 1  | 0.20152 | 1.301  | WT   | R10W | Sorting nexin-1 GN=SNX1                                                                      |
| Q14192 FHL2_HUMAN                                                      | 2   | 2  | 0.20228 | 1.223  | R10W | WT   | Four and a half LIM domains protein 2 GN=FHL2                                                |
| Q9BWS9 CHID1_HUMAN                                                     | 1   | 1  | 0.20368 | 1.284  | R10W | WT   | Chitinase domain-containing protein 1 GN=CHID1                                               |
| P68371 TBB4B_HUMAN                                                     | 161 | 2  | 0.20518 | 2.015  | R10W | WT   | Tubulin beta-4B chain GN=TUBB4B                                                              |
| Q06055 AT5G2_HUMAN                                                     | 1   | 1  | 0.20795 | 1.978  | R10W | WT   | ATP synthase F(0) complex subunit C2, mitochondrial GN=ATP5MC2                               |
| P0CG47 UBB_HUMAN;P0CG48 UBC_HUMAN;P62979 RS27A_HUMAN;P62987 RL40_HUMAN | 1   | 1  | 0.21160 | 1.391  | R10W | WT   | Polyubiquitin-B GN=UBB                                                                       |
| O00743 PPP6_HUMAN                                                      | 3   | 3  | 0.21529 | 1.103  | WT   | R10W | Serine/threonine-protein phosphatase 6 catalytic subunit GN=PPP6C                            |
| Q8NF37 PCAT1_HUMAN                                                     | 1   | 1  | 0.21591 | 1.956  | R10W | WT   | Lysophosphatidylcholine acyltransferase 1 GN=LPCAT1                                          |
| Q8TAT6 NPPL4_HUMAN                                                     | 2   | 2  | 0.21787 | 1.573  | R10W | WT   | Nuclear protein localization protein 4 homolog GN=NPLOC4                                     |
| O43684 BUB3_HUMAN                                                      | 1   | 1  | 0.21931 | 1.278  | R10W | WT   | Mitotic checkpoint protein BUB3 GN=BUB3                                                      |
| AOA0C4DH26 KVD41_HUMAN                                                 | 11  | 1  | 0.22154 | 1.396  | R10W | WT   | Probable non-functional immunoglobulin kappa variable 6D-41 GN=IGKV6D-41 PE=5                |
| Q04323 UBXN1_HUMAN                                                     | 2   | 2  | 0.22288 | 1.281  | R10W | WT   | UBX domain-containing protein 1 GN=UBXN1                                                     |
| P35527 K1C9_HUMAN                                                      | 14  | 14 | 0.22925 | 8.057  | WT   | R10W | Keratin, type I cytoskeletal 9 GN=KRT9                                                       |
| P53677 AP3M2_HUMAN                                                     | 1   | 1  | 0.23104 | 1.904  | WT   | R10W | AP-3 complex subunit mu-2 GN=AP3M2                                                           |
| Q15369 ELOC_HUMAN                                                      | 1   | 1  | 0.23547 | 1.331  | WT   | R10W | Elongin-C GN=ELOC                                                                            |
| Q99470 SDF2_HUMAN                                                      | 2   | 2  | 0.23885 | 1.186  | R10W | WT   | Stromal cell-derived factor 2 GN=SDF2                                                        |
| P05783 K1C18_HUMAN                                                     | 8   | 7  | 0.24189 | 1.528  | R10W | WT   | Keratin, type I cytoskeletal 18 GN=KRT18                                                     |
| Q53H12 AGK_HUMAN                                                       | 1   | 1  | 0.24524 | 2.215  | R10W | WT   | Acylglycerol kinase, mitochondrial GN=AGK                                                    |
| P13995 MTDC_HUMAN                                                      | 10  | 10 | 0.24632 | 1.302  | WT   | R10W | Bifunctional methylenetetrahydrofolate dehydrogenase/cyclohydrolase, mitochondrial GN=MTHFD2 |
| P05386 RLA1_HUMAN                                                      | 3   | 3  | 0.24748 | 1.197  | R10W | WT   | 60S acidic ribosomal protein P1 GN=RPL1                                                      |
| Q8NC96 NECP1_HUMAN                                                     | 24  | 20 | 0.24765 | 1.361  | WT   | R10W | Adaptin ear-binding coat-associated protein 1 GN=NECAP1                                      |
| P04746 AMYP_HUMAN                                                      | 4   | 4  | 0.24790 | 5.354  | WT   | R10W | Pancreatic alpha-amylase GN=AMY2A                                                            |
| P33993 MCM7_HUMAN                                                      | 2   | 2  | 0.24835 | 1.279  | R10W | WT   | DNA replication licensing factor MCM7 GN=MCM7                                                |
| P27824 CALX_HUMAN                                                      | 5   | 5  | 0.24892 | 1.285  | R10W | WT   | Calnexin GN=CANX                                                                             |
| Q9BQE3 TBA1C_HUMAN                                                     | 95  | 3  | 0.25920 | 1.115  | R10W | WT   | Tubulin alpha-1C chain GN=TUBA1C                                                             |
| P68363 TBA1B_HUMAN                                                     | 96  | 1  | 0.25920 | 1.115  | R10W | WT   | Tubulin alpha-1B chain GN=TUBA1B                                                             |
| Q71U36 TBA1A_HUMAN                                                     | 92  | 2  | 0.25920 | 1.115  | R10W | WT   | Tubulin alpha-1A chain GN=TUBA1A                                                             |
| P42566 EPS15_HUMAN                                                     | 90  | 88 | 0.25921 | 1.336  | WT   | R10W | Epidermal growth factor receptor substrate 15 GN=EPS15                                       |
| P06576 ATPB_HUMAN                                                      | 14  | 14 | 0.26410 | 1.143  | R10W | WT   | ATP synthase subunit beta, mitochondrial GN=ATP5F1B                                          |
| P51170 SCNNG_HUMAN                                                     | 1   | 1  | 0.26842 | 1.258  | R10W | WT   | Amiloride-sensitive sodium channel subunit gamma GN=SCNN1G                                   |
| P56545 CTBP2_HUMAN                                                     | 1   | 1  | 0.27213 | 1.185  | R10W | WT   | C-terminal-binding protein 2 GN=CTBP2                                                        |
| O14654 IRS4_HUMAN                                                      | 1   | 1  | 0.27860 | 1.676  | WT   | R10W | Insulin receptor substrate 4 GN=IRS4                                                         |
| O75880 SCO1_HUMAN                                                      | 1   | 1  | 0.27867 | 1.200  | WT   | R10W | Protein SCO1 homolog, mitochondrial GN=SCO1                                                  |
| Q562R1 ACTBL_HUMAN                                                     | 19  | 1  | 0.29179 | 1.316  | R10W | WT   | Beta-actin-like protein 2 GN=ACTBL2                                                          |

|        |                                                                                                            |    |    |         |       |      |      |                                                                          |              |
|--------|------------------------------------------------------------------------------------------------------------|----|----|---------|-------|------|------|--------------------------------------------------------------------------|--------------|
|        | Q9NVI7 ATD3A_HUMAN                                                                                         | 1  | 1  | 0.29412 | 1.480 | R10W | WT   | ATPase family AAA domain-containing protein 3A                           | GN=ATAD3A    |
|        | P22695 QCR2_HUMAN                                                                                          | 4  | 4  | 0.30082 | 1.404 | R10W | WT   | Cytochrome b-c1 complex subunit 2, mitochondrial                         | GN=UQCRC2    |
|        | P35908 K22E_HUMAN                                                                                          | 3  | 1  | 0.30499 | 3.162 | WT   | R10W | Keratin, type II cytoskeletal 2 epidermal                                | GN=KRT2      |
| P16989 | YBOX3_HUMAN;P67809 YBOX1_HUMAN                                                                             | 2  | 2  | 0.30597 | 1.293 | R10W | WT   | Y-box-binding protein 3                                                  | GN=YBX3      |
|        | P37802 TAGL2_HUMAN                                                                                         | 1  | 1  | 0.30932 | 1.426 | R10W | WT   | Transgelin-2                                                             | GN=TAGLN2    |
|        | Q8NEZ5 FBX22_HUMAN                                                                                         | 35 | 34 | 0.31136 | 1.063 | R10W | WT   | F-box only protein 22                                                    | GN=FBXO22    |
|        | P55036 PSMD4_HUMAN                                                                                         | 5  | 5  | 0.31855 | 1.141 | R10W | WT   | 26S proteasome non-ATPase regulatory subunit 4                           | GN=PSMD4     |
|        | P13804 ETFFA_HUMAN                                                                                         | 1  | 1  | 0.32379 | 1.324 | WT   | R10W | Electron transfer flavoprotein subunit alpha, mitochondrial              | GN=ETFFA     |
|        | P29692 EF1D_HUMAN                                                                                          | 4  | 3  | 0.32613 | 1.230 | R10W | WT   | Elongation factor 1-delta                                                | GN=EEF1D     |
|        | Q14697 GANAB_HUMAN                                                                                         | 1  | 1  | 0.32849 | 1.306 | R10W | WT   | Neutral alpha-glucosidase AB                                             | GN=GANAB     |
|        | P41250 GARS_HUMAN                                                                                          | 7  | 7  | 0.33295 | 1.161 | WT   | R10W | Glycine--tRNA ligase                                                     | GN=GARS1     |
|        | P04843 RPN1_HUMAN                                                                                          | 2  | 2  | 0.33547 | 1.436 | WT   | R10W | Dolichyl-diphosphooligosaccharide--protein glycosyltransferase subunit 1 | GN=RPN1      |
|        | A2NJV5 KV229_HUMAN                                                                                         | 32 | 1  | 0.33699 | 2.918 | R10W | WT   | Immunoglobulin kappa variable 2-29                                       | GN=IGKV2-29  |
|        | O75396 SC22B_HUMAN                                                                                         | 1  | 1  | 0.34014 | 1.219 | WT   | R10W | Vesicle-trafficking protein SEC22b                                       | GN=SEC22B    |
|        | P01601 KVD16_HUMAN                                                                                         | 14 | 2  | 0.34058 | 1.225 | R10W | WT   | Immunoglobulin kappa variable 1D-16                                      | GN=IGKV1D-16 |
|        | P01854 IGHE_HUMAN                                                                                          | 1  | 1  | 0.34084 | 1.143 | R10W | WT   | Immunoglobulin heavy constant epsilon                                    | GN=IGHE      |
|        | A0A0C4DH24 KV621_HUMAN                                                                                     | 13 | 2  | 0.34179 | 1.260 | R10W | WT   | Immunoglobulin kappa variable 6-21                                       | GN=IGKV6-21  |
|        | P23284 PPIB_HUMAN                                                                                          | 1  | 1  | 0.34624 | 2.122 | R10W | WT   | Peptidyl-prolyl cis-trans isomerase B                                    | GN=PPIB      |
|        | O75439 MPPB_HUMAN                                                                                          | 1  | 1  | 0.34782 | 1.909 | WT   | R10W | Mitochondrial-processing peptidase subunit beta                          | GN=PMPCB     |
| P16520 | GBB3_HUMAN;P62873 GBB1_HUMAN;P62879 GBB2_HUMAN                                                             | 2  | 2  | 0.34806 | 1.437 | R10W | WT   | Guanine nucleotide-binding protein G(I)/G(S)/G(T) subunit beta-3         | GN=GNB3      |
|        | O14561 ACPM_HUMAN                                                                                          | 1  | 1  | 0.34927 | 1.357 | WT   | R10W | Acyl carrier protein, mitochondrial                                      | GN=NDUFAB1   |
|        | P52597 HNRPF_HUMAN                                                                                         | 4  | 4  | 0.35188 | 1.109 | R10W | WT   | Heterogeneous nuclear ribonucleoprotein F                                | GN=HNRNPF    |
|        | Q8WXE9 STON2_HUMAN                                                                                         | 4  | 4  | 0.35571 | 1.520 | WT   | R10W | Stonin-2                                                                 | GN=STON2     |
|        | Q00610 CLH1_HUMAN                                                                                          | 8  | 8  | 0.35579 | 1.173 | R10W | WT   | Clathrin heavy chain 1                                                   | GN=CLTC      |
|        | P11177 ODPB_HUMAN                                                                                          | 2  | 2  | 0.36057 | 1.202 | R10W | WT   | Pyruvate dehydrogenase E1 component subunit beta, mitochondrial          | GN=PDHB      |
|        | Q9Y5Y2 NUBP2_HUMAN                                                                                         | 2  | 2  | 0.36659 | 1.267 | R10W | WT   | Cytosolic Fe-S cluster assembly factor NUBP2                             | GN=NUBP2     |
|        | Q14694 UBP10_HUMAN                                                                                         | 1  | 1  | 0.36663 | 1.184 | R10W | WT   | Ubiquitin carboxyl-terminal hydrolase 10                                 | GN=USP10     |
|        | P01859 IGHG2_HUMAN                                                                                         | 21 | 10 | 0.36718 | 1.422 | R10W | WT   | Immunoglobulin heavy constant gamma 2                                    | GN=IGHG2     |
|        | P06748 NPM_HUMAN                                                                                           | 7  | 7  | 0.36799 | 1.128 | R10W | WT   | Nucleophosmin                                                            | GN=NPM1      |
|        | A0A0C4DH34 HV428_HUMAN                                                                                     | 6  | 3  | 0.36861 | 1.150 | R10W | WT   | Immunoglobulin heavy variable 4-28                                       | GN=IGHV4-28  |
|        | O43143 DHX15_HUMAN                                                                                         | 1  | 1  | 0.37389 | 1.475 | R10W | WT   | Pre-mRNA-splicing factor ATP-dependent RNA helicase DHX15                | GN=DHX15     |
|        | P50225 ST1A1_HUMAN                                                                                         | 2  | 2  | 0.37626 | 1.241 | WT   | R10W | Sulfotransferase 1A1                                                     | GN=SULT1A1   |
|        | Q13347 EIF3I_HUMAN                                                                                         | 2  | 2  | 0.37710 | 1.152 | R10W | WT   | Eukaryotic translation initiation factor 3 subunit I                     | GN=EIF3I     |
|        | P05387 RLA2_HUMAN                                                                                          | 3  | 3  | 0.37856 | 1.132 | R10W | WT   | 60S acidic ribosomal protein P2                                          | GN=RPLP2     |
|        | P08708 RS17_HUMAN                                                                                          | 3  | 3  | 0.37868 | 1.111 | R10W | WT   | 40S ribosomal protein S17                                                | GN=RPS17     |
|        | Q9NR30 DDX21_HUMAN                                                                                         | 2  | 2  | 0.37918 | 1.210 | R10W | WT   | Nucleolar RNA helicase 2                                                 | GN=DDX21     |
|        | Q07021 C1QBP_HUMAN                                                                                         | 1  | 1  | 0.38088 | 1.343 | R10W | WT   | Complement component 1 Q subcomponent-binding protein, mitochondrial     | GN=C1QBP     |
|        | P23246 SFPQ_HUMAN                                                                                          | 3  | 2  | 0.38167 | 1.061 | R10W | WT   | Splicing factor, proline- and glutamine-rich                             | GN=SFPQ      |
|        | P43490 NAMPT_HUMAN                                                                                         | 1  | 1  | 0.38377 | 1.475 | R10W | WT   | Nicotinamide phosphoribosyltransferase                                   | GN=NAMPT     |
| P41091 | IF2G_HUMAN;Q2VIR3 IF2GL_HUMAN                                                                              | 1  | 1  | 0.38406 | 1.450 | WT   | R10W | Eukaryotic translation initiation factor 2 subunit 3                     | GN=EIF2S3    |
|        | Q658Y4 F91A1_HUMAN                                                                                         | 1  | 1  | 0.38481 | 1.229 | R10W | WT   | Protein FAM91A1                                                          | GN=FAM91A1   |
|        | P04433 KV311_HUMAN                                                                                         | 12 | 2  | 0.38511 | 1.173 | R10W | WT   | Immunoglobulin kappa variable 3-11                                       | GN=IGKV3-11  |
|        | Q10713 MPPA_HUMAN                                                                                          | 1  | 1  | 0.38573 | 1.413 | WT   | R10W | Mitochondrial-processing peptidase subunit alpha                         | GN=PMPCB     |
|        | P13010 XRCC5_HUMAN                                                                                         | 4  | 4  | 0.38810 | 1.271 | WT   | R10W | X-ray repair cross-complementing protein 5                               | GN=XRCC5     |
|        | P11586 C1TC_HUMAN                                                                                          | 1  | 1  | 0.39202 | 1.346 | WT   | R10W | C-1-tetrahydrofolate synthase, cytoplasmic                               | GN=MTHFD1    |
|        | Q9BSD7 NTPCR_HUMAN                                                                                         | 4  | 4  | 0.39547 | 1.142 | R10W | WT   | Cancer-related nucleoside-triphosphatase                                 | GN=NTPCR     |
|        | P68104 EF1A1_HUMAN                                                                                         | 79 | 79 | 0.39584 | 1.181 | R10W | WT   | Elongation factor 1-alpha 1                                              | GN=EEF1A1    |
|        | P62701 RS4X_HUMAN                                                                                          | 8  | 8  | 0.39787 | 1.478 | R10W | WT   | 40S ribosomal protein S4, X isoform                                      | GN=RPS4X     |
| P58876 | H2B1D_HUMAN;P62807 H2B1C_HUMAN;Q5QNW6 H2B2F_HUMAN;Q93079 H2B1H_HUMAN;Q99877 H2B1N_HUMAN;Q99879 H2B1M_HUMAN | 21 | 21 | 0.39815 | 1.268 | R10W | WT   | Histone H2B type 1-D                                                     | GN=H2BC5     |
|        | Q02790 FKBP4_HUMAN                                                                                         | 2  | 2  | 0.39916 | 1.208 | R10W | WT   | Peptidyl-prolyl cis-trans isomerase FKBP4                                | GN=FKBP4     |
|        | O95373 IPO7_HUMAN                                                                                          | 1  | 1  | 0.39973 | 1.433 | R10W | WT   | Importin-7                                                               | GN=IPO7      |
|        | P17987 TCPA_HUMAN                                                                                          | 7  | 6  | 0.40208 | 1.213 | R10W | WT   | T-complex protein 1 subunit alpha                                        | GN=TCP1      |
|        | Q14204 DYHC1_HUMAN                                                                                         | 1  | 1  | 0.40464 | 1.218 | R10W | WT   | Cytoplasmic dynein 1 heavy chain 1                                       | GN=DYNC1H1   |
|        | Q9UBB4 ATX10_HUMAN                                                                                         | 1  | 1  | 0.40557 | 1.138 | R10W | WT   | Ataxin-10                                                                | GN=ATXN10    |
|        | P09936 UCHL1_HUMAN                                                                                         | 2  | 2  | 0.40937 | 1.060 | R10W | WT   | Ubiquitin carboxyl-terminal hydrolase isozyme L1                         | GN=UCHL1     |
|        | P08670 VIME_HUMAN                                                                                          | 3  | 2  | 0.40978 | 1.298 | R10W | WT   | Vimentin                                                                 | GN=VIM       |
|        | Q7L1W4 LRRC8D_HUMAN                                                                                        | 1  | 1  | 0.41177 | 1.169 | R10W | WT   | Volume-regulated anion channel subunit LRRC8D                            | GN=LRRC8D    |

|                                                                                                                                    |     |    |         |       |      |      |                                                                                |
|------------------------------------------------------------------------------------------------------------------------------------|-----|----|---------|-------|------|------|--------------------------------------------------------------------------------|
| P56945 BCAR1_HUMAN                                                                                                                 | 52  | 50 | 0.42314 | 1.378 | R10W | WT   | Breast cancer anti-estrogen resistance protein 1 GN=BCAR1                      |
| A0A075B6I0 LV861_HUMAN                                                                                                             | 1   | 1  | 0.42517 | 1.206 | R10W | WT   | Immunoglobulin lambda variable 8-61 GN=IGLV8-61                                |
| Q5H9R7 PP6R3_HUMAN                                                                                                                 | 3   | 3  | 0.42589 | 1.480 | WT   | R10W | Serine/threonine-protein phosphatase 6 regulatory subunit 3 GN=PPP6R3          |
| POC0S8 H2A1_HUMAN;P20671 H2A1D_HUMAN;Q16777 H2A2C_HUMAN;Q6F113 H2A2A_HUMAN;Q96KK5 H2A1H_HUMAN;Q99878 H2A1J_HUMAN;Q9BTM1 H2AJ_HUMAN | 9   | 8  | 0.42674 | 1.479 | R10W | WT   | Histone H2A type 1 GN=H2AC11                                                   |
| P14618 KPYM_HUMAN                                                                                                                  | 53  | 52 | 0.42712 | 1.163 | WT   | R10W | Pyruvate kinase PKM GN=PKM                                                     |
| Q9HCC0 MCCB_HUMAN                                                                                                                  | 2   | 2  | 0.42713 | 1.154 | WT   | R10W | Methylcrotonoyl-CoA carboxylase beta chain, mitochondrial GN=MCCC2             |
| Q15366 PCBP2_HUMAN                                                                                                                 | 11  | 6  | 0.42765 | 1.150 | R10W | WT   | Poly(rC)-binding protein 2 GN=PCBP2                                            |
| Q13011 ECH1_HUMAN                                                                                                                  | 5   | 5  | 0.43046 | 1.205 | WT   | R10W | Delta(3,5)-Delta(2,4)-dienoyl-CoA isomerase, mitochondrial GN=ECH1             |
| P25705 ATPA_HUMAN                                                                                                                  | 23  | 23 | 0.43273 | 1.249 | R10W | WT   | ATP synthase subunit alpha, mitochondrial GN=ATP5F1A                           |
| P23378 GCSP_HUMAN                                                                                                                  | 1   | 1  | 0.43495 | 1.314 | R10W | WT   | Glycine dehydrogenase (decarboxylating), mitochondrial GN=GLDC                 |
| Q2M2I8 AAK1_HUMAN                                                                                                                  | 12  | 10 | 0.43658 | 1.302 | WT   | R10W | AP2-associated protein kinase 1 GN=AAK1                                        |
| P68871 HBB_HUMAN                                                                                                                   | 8   | 8  | 0.44261 | 1.270 | R10W | WT   | Hemoglobin subunit beta GN=HBB                                                 |
| Q15233 NONO_HUMAN                                                                                                                  | 7   | 6  | 0.44423 | 1.198 | R10W | WT   | Non-POU domain-containing octamer-binding protein GN=NONO                      |
| P50395 GDIB_HUMAN                                                                                                                  | 1   | 1  | 0.44494 | 1.288 | R10W | WT   | Rab GDP dissociation inhibitor beta GN=GDID2                                   |
| P18124 RL7_HUMAN                                                                                                                   | 4   | 3  | 0.44531 | 1.202 | R10W | WT   | 60S ribosomal protein L7 GN=RPL7                                               |
| P15924 DESP_HUMAN                                                                                                                  | 3   | 3  | 0.45113 | 1.781 | R10W | WT   | Desmoplakin GN=DSP                                                             |
| Q9Y2I6 NINL_HUMAN                                                                                                                  | 1   | 1  | 0.45515 | 1.192 | WT   | R10W | Ninein-like protein GN=NINL                                                    |
| P62805 H4_HUMAN                                                                                                                    | 4   | 4  | 0.45584 | 1.394 | R10W | WT   | Histone H4 GN=H4C1                                                             |
| P09651 ROA1_HUMAN;Q32P51 RA1L2_HUMAN                                                                                               | 1   | 1  | 0.46235 | 1.156 | R10W | WT   | Heterogeneous nuclear ribonucleoprotein A1 GN=HNRNPA1                          |
| P62753 RS6_HUMAN                                                                                                                   | 3   | 3  | 0.46947 | 1.165 | WT   | R10W | 40S ribosomal protein S6 GN=RPS6                                               |
| P03254 E1A_ADE02;P03255 E1A_ADE05                                                                                                  | 1   | 1  | 0.47068 | 2.247 | WT   | R10W | Early E1A protein OS=Human adenovirus C serotype 2 OX=10515                    |
| P51571 SSRD_HUMAN                                                                                                                  | 2   | 2  | 0.47211 | 1.132 | R10W | WT   | Translocon-associated protein subunit delta GN=SSR4                            |
| Q15758 AAAT_HUMAN                                                                                                                  | 1   | 1  | 0.47245 | 1.168 | R10W | WT   | Neutral amino acid transporter B(0) GN=SLC1A5                                  |
| P19623 SPEE_HUMAN                                                                                                                  | 4   | 4  | 0.47427 | 1.163 | R10W | WT   | Spermidine synthase GN=SRM                                                     |
| Q75531 BAF_HUMAN                                                                                                                   | 1   | 1  | 0.47745 | 4.781 | WT   | R10W | Barrier-to-autointegration factor GN=BANF1                                     |
| P07355 ANXA2_HUMAN                                                                                                                 | 3   | 3  | 0.48178 | 1.666 | R10W | WT   | Annexin A2 GN=ANXA2                                                            |
| O00244 ATOX1_HUMAN                                                                                                                 | 1   | 1  | 0.48293 | 1.147 | WT   | R10W | Copper transport protein ATOX1 GN=ATOX1                                        |
| Q494V2 CP100_HUMAN                                                                                                                 | 1   | 1  | 0.48715 | 1.565 | R10W | WT   | Cilia- and flagella-associated protein 100 GN=CFAP100                          |
| Q95678 K2C75_HUMAN                                                                                                                 | 4   | 1  | 0.48818 | 1.105 | R10W | WT   | Keratin, type II cytoskeletal 75 GN=KRT75                                      |
| O00370 LORF2_HUMAN                                                                                                                 | 1   | 1  | 0.49183 | 1.151 | R10W | WT   | LINE-1 retrotransposable element ORF2 protein                                  |
| Q13643 FHL3_HUMAN                                                                                                                  | 3   | 3  | 0.49274 | 1.250 | R10W | WT   | Four and a half LIM domains protein 3 GN=FHL3                                  |
| P22061 PIMT_HUMAN                                                                                                                  | 25  | 25 | 0.49299 | 1.095 | R10W | WT   | Protein-L-isoaspartate(D-aspartate) O-methyltransferase GN=PCMT1               |
| P05388 RLA0_HUMAN                                                                                                                  | 3   | 3  | 0.49387 | 1.262 | R10W | WT   | 60S acidic ribosomal protein P0 GN=RPLP0                                       |
| P62266 RS23_HUMAN                                                                                                                  | 1   | 1  | 0.49405 | 1.243 | WT   | R10W | 40S ribosomal protein S23 GN=RPS23                                             |
| P07437 TBB5_HUMAN                                                                                                                  | 163 | 10 | 0.50719 | 1.077 | R10W | WT   | Tubulin beta chain GN=TUBB                                                     |
| Q06210 GFPT1_HUMAN                                                                                                                 | 1   | 1  | 0.50973 | 1.083 | R10W | WT   | Glutamine--fructose-6-phosphate aminotransferase [isomerizing] 1 GN=GFPT1      |
| Q16576 RBBP7_HUMAN                                                                                                                 | 7   | 7  | 0.51098 | 1.145 | WT   | R10W | Histone-binding protein RBBP7 GN=RBBP7                                         |
| Q9BRK5 CAB45_HUMAN                                                                                                                 | 2   | 2  | 0.51506 | 1.182 | R10W | WT   | 45 kDa calcium-binding protein GN=SDF4                                         |
| P50991 TCPD_HUMAN                                                                                                                  | 9   | 8  | 0.51627 | 1.161 | R10W | WT   | T-complex protein 1 subunit delta GN=CCT4                                      |
| Q99832 TCPH_HUMAN                                                                                                                  | 7   | 6  | 0.52128 | 1.240 | R10W | WT   | T-complex protein 1 subunit eta GN=CCT7                                        |
| Q9Y305 ACOT9_HUMAN                                                                                                                 | 7   | 7  | 0.52466 | 1.133 | WT   | R10W | Acyl-coenzyme A thioesterase 9, mitochondrial GN=ACOT9                         |
| P69905 HBA_HUMAN                                                                                                                   | 7   | 7  | 0.52486 | 1.381 | R10W | WT   | Hemoglobin subunit alpha GN=HBA1                                               |
| Q9P258 RCC2_HUMAN                                                                                                                  | 5   | 5  | 0.52635 | 1.045 | WT   | R10W | Protein RCC2 GN=RCC2                                                           |
| Q9UM54 MYO6_HUMAN                                                                                                                  | 1   | 1  | 0.53250 | 1.346 | R10W | WT   | Unconventional myosin-VI GN=MYO6                                               |
| Q14207 NPAT_HUMAN                                                                                                                  | 1   | 1  | 0.53308 | 1.175 | R10W | WT   | Protein NPAT GN=NPAT                                                           |
| P62906 RL10A_HUMAN                                                                                                                 | 6   | 6  | 0.53357 | 1.145 | R10W | WT   | 60S ribosomal protein L10a GN=RPL10A                                           |
| Q96CW1 AP2M1_HUMAN                                                                                                                 | 95  | 92 | 0.53416 | 1.333 | WT   | R10W | AP-2 complex subunit mu GN=AP2M1                                               |
| Q9Y266 NUDC_HUMAN                                                                                                                  | 2   | 2  | 0.53566 | 1.117 | R10W | WT   | Nuclear migration protein nudC GN=NUDC                                         |
| P53597 SUCA_HUMAN                                                                                                                  | 1   | 1  | 0.54125 | 1.266 | WT   | R10W | Succinate--CoA ligase [ADP/GDP-forming] subunit alpha, mitochondrial GN=SUCLG1 |
| Q9BRP1 PDD2L_HUMAN                                                                                                                 | 1   | 1  | 0.54149 | 1.125 | R10W | WT   | Programmed cell death protein 2-like GN=PDCC2L                                 |
| P54136 SYRC_HUMAN                                                                                                                  | 1   | 1  | 0.54639 | 1.151 | R10W | WT   | Arginine--tRNA ligase, cytoplasmic GN=RARS1                                    |
| P60709 ACTB_HUMAN;P63261 ACTG_HUMAN                                                                                                | 40  | 20 | 0.54897 | 1.103 | R10W | WT   | Actin, cytoplasmic 1 GN=ACTB                                                   |
| Q07065 CKAP4_HUMAN                                                                                                                 | 7   | 7  | 0.54924 | 1.137 | WT   | R10W | Cytoskeleton-associated protein 4 GN=CKAP4                                     |
| P07737 PROF1_HUMAN                                                                                                                 | 1   | 1  | 0.54940 | 1.558 | R10W | WT   | Profilin-1 GN=PFN1                                                             |
| Q14818 PSA7_HUMAN                                                                                                                  | 1   | 1  | 0.54941 | 1.117 | R10W | WT   | Proteasome subunit alpha type-7 GN=PSMA7                                       |
| P35579 MYH9_HUMAN;P35580 MYH10_HUMAN                                                                                               | 1   | 1  | 0.55104 | 1.082 | R10W | WT   | Myosin-9 GN=MYH9                                                               |
| P10809 CH60_HUMAN                                                                                                                  | 71  | 71 | 0.55689 | 1.235 | R10W | WT   | 60 kDa heat shock protein, mitochondrial GN=HSPD1                              |
| Q96JB1 DYH8_HUMAN                                                                                                                  | 1   | 1  | 0.55739 | 1.138 | WT   | R10W | Dynein heavy chain 8, axonemal GN=DNAH8                                        |

|                                                          |     |    |         |       |      |      |                                                                      |
|----------------------------------------------------------|-----|----|---------|-------|------|------|----------------------------------------------------------------------|
| A0A075B6S6 KVD30_HUMAN;P06310 KV230_HUMAN                | 52  | 21 | 0.56094 | 1.244 | R10W | WT   | Immunoglobulin kappa variable 2D-30 GN=IGKV2D-30                     |
| P35998 PRS7_HUMAN                                        | 4   | 4  | 0.56210 | 1.094 | R10W | WT   | 26S proteasome regulatory subunit 7 GN=PSMC2                         |
| Q9BUF5 TBB6_HUMAN                                        | 85  | 5  | 0.56372 | 1.334 | R10W | WT   | Tubulin beta-6 chain GN=TUBB6                                        |
| O43426 SYNJ1_HUMAN                                       | 3   | 3  | 0.56428 | 1.164 | WT   | R10W | Synaptotagmin-1 GN=SYNJ1                                             |
| P0DMV8 HS71A_HUMAN;P0DMV9 HS71B_HUMAN                    | 121 | 55 | 0.56464 | 1.103 | WT   | R10W | Heat shock 70 kDa protein 1A GN=HSPA1A                               |
| P26038 MOES_HUMAN                                        | 1   | 1  | 0.56762 | 1.137 | WT   | R10W | Moesin GN=MSN                                                        |
| P27635 RL10_HUMAN                                        | 2   | 2  | 0.57192 | 1.256 | R10W | WT   | 60S ribosomal protein L10 GN=RPL10                                   |
| P50454 SERPH_HUMAN                                       | 9   | 8  | 0.57503 | 1.257 | R10W | WT   | Serpin H1 GN=SERPINH1                                                |
| P34897 GLYM_HUMAN                                        | 2   | 2  | 0.57518 | 1.184 | WT   | R10W | Serine hydroxymethyltransferase, mitochondrial GN=SHMT2              |
| P08865 RSSA_HUMAN                                        | 2   | 2  | 0.57804 | 1.240 | R10W | WT   | 40S ribosomal protein SA GN=RPSA                                     |
| Q13616 CUL1_HUMAN                                        | 1   | 1  | 0.57805 | 1.334 | R10W | WT   | Cullin-1 GN=CUL1                                                     |
| P04181 OAT_HUMAN                                         | 12  | 12 | 0.58085 | 1.147 | WT   | R10W | Ornithine aminotransferase, mitochondrial GN=OAT                     |
| Q15370 ELOB_HUMAN                                        | 4   | 4  | 0.58674 | 1.208 | R10W | WT   | Elongin-B GN=ELOB                                                    |
| P36578 RL4_HUMAN                                         | 1   | 1  | 0.59200 | 1.162 | R10W | WT   | 60S ribosomal protein L4 GN=RPL4                                     |
| Q06830 PRDX1_HUMAN                                       | 10  | 10 | 0.59286 | 1.055 | WT   | R10W | Peroxiredoxin-1 GN=PRDX1                                             |
| P62318 SMD3_HUMAN                                        | 1   | 1  | 0.59468 | 1.515 | R10W | WT   | Small nuclear ribonucleoprotein Sm D3 GN=SNRPD3                      |
| P62910 RL32_HUMAN                                        | 1   | 1  | 0.59608 | 1.121 | WT   | R10W | 60S ribosomal protein L32 GN=RPL32                                   |
| Q6PCT2 FXL19_HUMAN                                       | 1   | 1  | 0.59718 | 1.130 | WT   | R10W | F-box/LRR-repeat protein 19 GN=FBXL19                                |
| Q13885 TBB2A_HUMAN                                       | 140 | 4  | 0.59888 | 1.237 | R10W | WT   | Tubulin beta-2A chain GN=TUBB2A                                      |
| P51114 FXR1_HUMAN                                        | 1   | 1  | 0.60230 | 1.105 | WT   | R10W | Fragile X mental retardation syndrome-related protein 1 GN=FXR1      |
| P30050 RL12_HUMAN                                        | 4   | 4  | 0.61032 | 1.091 | R10W | WT   | 60S ribosomal protein L12 GN=RPL12                                   |
| P61978 HNRPK_HUMAN                                       | 8   | 8  | 0.61410 | 1.108 | R10W | WT   | Heterogeneous nuclear ribonucleoprotein K GN=HNRNPK                  |
| P46778 RL21_HUMAN                                        | 2   | 2  | 0.61794 | 1.090 | R10W | WT   | 60S ribosomal protein L21 GN=RPL21                                   |
| O95817 BAG3_HUMAN                                        | 1   | 1  | 0.61902 | 1.174 | R10W | WT   | BAG family molecular chaperone regulator 3 GN=BAG3                   |
| P78371 TCPB_HUMAN                                        | 10  | 8  | 0.62479 | 1.056 | WT   | R10W | T-complex protein 1 subunit beta GN=CCT2                             |
| P62249 RS16_HUMAN                                        | 2   | 2  | 0.62628 | 1.104 | R10W | WT   | 40S ribosomal protein S16 GN=RPS16                                   |
| P0DP23 CALM1_HUMAN;P0DP24 CALM2_HUMAN;P0DP25 CALM3_HUMAN | 4   | 4  | 0.62661 | 1.089 | R10W | WT   | Calmodulin-1 GN=CALM1                                                |
| Q8ND24 RN214_HUMAN                                       | 1   | 1  | 0.62699 | 1.155 | R10W | WT   | RING finger protein 214 GN=RFN214                                    |
| P14174 MIF_HUMAN                                         | 3   | 3  | 0.62721 | 1.049 | WT   | R10W | Macrophage migration inhibitory factor GN=MIF                        |
| P12277 KCRB_HUMAN                                        | 6   | 6  | 0.62875 | 1.088 | R10W | WT   | Creatine kinase B-type GN=CKB                                        |
| P42704 LPPRC_HUMAN                                       | 1   | 1  | 0.62912 | 1.258 | WT   | R10W | Leucine-rich PPR motif-containing protein, mitochondrial GN=LRPPRC   |
| Q12962 TAF10_HUMAN                                       | 1   | 1  | 0.62927 | 1.051 | R10W | WT   | Transcription initiation factor TFIID subunit 10 GN=TAF10            |
| Q14576 ELAV3_HUMAN                                       | 1   | 1  | 0.63355 | 1.245 | R10W | WT   | ELAV-like protein 3 GN=ELAVL3                                        |
| P62899 RL31_HUMAN                                        | 1   | 1  | 0.64659 | 1.054 | R10W | WT   | 60S ribosomal protein L31 GN=RPL31                                   |
| P11908 PRPS2_HUMAN;P60891 PRPS1_HUMAN                    | 3   | 3  | 0.65012 | 1.063 | R10W | WT   | Ribose-phosphate pyrophosphokinase 2 GN=PRPS2                        |
| P07814 SYEP_HUMAN                                        | 1   | 1  | 0.65218 | 1.068 | R10W | WT   | Bifunctional glutamate/proline--tRNA ligase GN=EPRS1                 |
| P52701 MSH6_HUMAN                                        | 1   | 1  | 0.65316 | 1.223 | R10W | WT   | DNA mismatch repair protein Msh6 GN=MSH6                             |
| P49207 RL34_HUMAN                                        | 2   | 2  | 0.65398 | 1.100 | WT   | R10W | 60S ribosomal protein L34 GN=RPL34                                   |
| P02679 FIBG_HUMAN                                        | 4   | 4  | 0.66108 | 1.182 | R10W | WT   | Fibrinogen gamma chain GN=FGG                                        |
| P62269 RS18_HUMAN                                        | 1   | 1  | 0.66392 | 1.080 | R10W | WT   | 40S ribosomal protein S18 GN=RPS18                                   |
| P07858 CATB_HUMAN                                        | 1   | 1  | 0.66442 | 2.121 | WT   | R10W | Cathepsin B GN=CTSB                                                  |
| P50213 IDH3A_HUMAN                                       | 5   | 5  | 0.66656 | 1.053 | WT   | R10W | Isocitrate dehydrogenase [NAD] subunit alpha, mitochondrial GN=IDH3A |
| P11021 BIP_HUMAN                                         | 13  | 8  | 0.66726 | 1.070 | R10W | WT   | Endoplasmic reticulum chaperone BIP GN=HSPA5                         |
| P07686 HEXB_HUMAN                                        | 1   | 1  | 0.66769 | 1.194 | R10W | WT   | Beta-hexosaminidase subunit beta GN=HEXB                             |
| P14209 CD99_HUMAN                                        | 1   | 1  | 0.66802 | 1.257 | WT   | R10W | CD99 antigen GN=CD99                                                 |
| P49915 GUAA_HUMAN                                        | 1   | 1  | 0.67824 | 1.356 | R10W | WT   | GMP synthase [glutamine-hydrolyzing] GN=GMPS                         |
| P56192 SYMC_HUMAN                                        | 1   | 1  | 0.68349 | 1.420 | R10W | WT   | Methionine--tRNA ligase, cytoplasmic GN=MARS1                        |
| P32969 RL9_HUMAN                                         | 4   | 4  | 0.68413 | 1.043 | R10W | WT   | 60S ribosomal protein L9 GN=RPL9                                     |
| P38646 GRP75_HUMAN                                       | 26  | 15 | 0.68706 | 1.031 | R10W | WT   | Stress-70 protein, mitochondrial GN=HSPA9                            |
| P62937 PPIA_HUMAN                                        | 18  | 17 | 0.69534 | 1.061 | R10W | WT   | Peptidyl-prolyl cis-trans isomerase A GN=PPIA                        |
| O75400 PR40A_HUMAN                                       | 1   | 1  | 0.69629 | 1.910 | WT   | R10W | Pre-mRNA-processing factor 40 homolog A GN=PRPF40A                   |
| P22314 UBA1_HUMAN                                        | 3   | 3  | 0.69735 | 1.118 | WT   | R10W | Ubiquitin-like modifier-activating enzyme 1 GN=UBA1                  |
| Q6ZSR9 YJ005_HUMAN                                       | 6   | 6  | 0.71085 | 1.076 | WT   | R10W | Uncharacterized protein FLJ45252                                     |
| P34932 HSP74_HUMAN                                       | 3   | 3  | 0.71163 | 1.075 | R10W | WT   | Heat shock 70 kDa protein 4 GN=HSPA4                                 |
| Q43175 SERA_HUMAN                                        | 6   | 6  | 0.71407 | 1.077 | WT   | R10W | D-3-phosphoglycerate dehydrogenase GN=PHGDH                          |
| P62424 RL7A_HUMAN                                        | 5   | 5  | 0.71452 | 1.049 | R10W | WT   | 60S ribosomal protein L7a GN=RPL7A                                   |
| Q14974 IMB1_HUMAN                                        | 7   | 7  | 0.71457 | 1.154 | R10W | WT   | Importin subunit beta-1 GN=KPNB1                                     |
| P78527 PRKDC_HUMAN                                       | 8   | 8  | 0.71711 | 1.042 | R10W | WT   | DNA-dependent protein kinase catalytic subunit GN=PRKDC              |
| P26583 HMGB2_HUMAN                                       | 1   | 1  | 0.72265 | 1.066 | R10W | WT   | High mobility group protein B2 GN=HMGB2                              |

|                                                          |    |    |         |       |      |      |                                                                            |                 |
|----------------------------------------------------------|----|----|---------|-------|------|------|----------------------------------------------------------------------------|-----------------|
| P49458 SRP09_HUMAN                                       | 1  | 1  | 0.72480 | 1.007 | R10W | WT   | Signal recognition particle 9 kDa protein                                  | GN=SRP9         |
| Q92854 SEM4D_HUMAN                                       | 1  | 1  | 0.72534 | 1.325 | R10W | WT   | Semaphorin-4D                                                              | GN=SEMA4D       |
| P32119 PRDX2_HUMAN                                       | 1  | 1  | 0.72552 | 1.172 | R10W | WT   | Peroxisomal protein 2                                                      | GN=PRDX2        |
| P01715 LV301_HUMAN                                       | 4  | 2  | 0.72632 | 1.240 | R10W | WT   | Immunoglobulin lambda variable 3-1                                         | GN=IGLV3-1      |
| Q15365 PCBP1_HUMAN                                       | 13 | 8  | 0.72778 | 1.110 | R10W | WT   | Poly(rC)-binding protein 1                                                 | GN=PCBP1        |
| O15371 EIF3D_HUMAN                                       | 1  | 1  | 0.73203 | 1.018 | R10W | WT   | Eukaryotic translation initiation factor 3 subunit D                       | GN=EIF3D        |
| A0A075B6S2 KVD29_HUMAN                                   | 33 | 2  | 0.73447 | 1.186 | R10W | WT   | Immunoglobulin kappa variable 2D-29                                        | GN=IGKV2D-29    |
| A8MWP6 YQ019_HUMAN;A8MXK9 YQ018_HUMAN                    | 1  | 1  | 0.73718 | 1.063 | R10W | WT   | Uncharacterized protein                                                    | ENSP0000382042  |
| O43776 SYNC_HUMAN                                        | 1  | 1  | 0.73830 | 1.048 | WT   | R10W | Asparagine--tRNA ligase, cytoplasmic                                       | GN=NARS1        |
| P41180 CASR_HUMAN                                        | 4  | 4  | 0.74118 | 1.072 | R10W | WT   | Extracellular calcium-sensing receptor                                     | GN=CASR         |
| Q9UKN7 MYO15_HUMAN                                       | 1  | 1  | 0.74172 | 1.733 | WT   | R10W | Unconventional myosin-XV                                                   | GN=MYO15A       |
| E9PAV3 NACAM_HUMAN;Q13765 NACA_HUMAN                     | 1  | 1  | 0.74465 | 1.051 | WT   | R10W | Nascent polypeptide-associated complex subunit alpha, muscle-specific form | GN=NACA         |
| P29120 NEC1_HUMAN                                        | 1  | 1  | 0.74573 | 1.044 | R10W | WT   | Neuroendocrine convertase 1                                                | GN=PCSK1        |
| A0A0B4J1U7 HV601_HUMAN                                   | 3  | 3  | 0.74617 | 1.062 | R10W | WT   | Immunoglobulin heavy variable 6-1                                          | GN=IGHV6-1      |
| P51570 GALK1_HUMAN                                       | 5  | 5  | 0.74721 | 1.150 | R10W | WT   | Galactokinase                                                              | GN=GALK1        |
| Q00839 HNRPU_HUMAN                                       | 2  | 2  | 0.74827 | 1.249 | R10W | WT   | Heterogeneous nuclear ribonucleoprotein U                                  | GN=HNRNPU       |
| P31040 SDHA_HUMAN                                        | 2  | 2  | 0.75101 | 1.067 | WT   | R10W | Succinate dehydrogenase [ubiquinone] flavoprotein subunit, mitochondrial   | GN=SDHA         |
| P26599 PTBP1_HUMAN                                       | 2  | 2  | 0.75210 | 1.083 | R10W | WT   | Polypyrimidine tract-binding protein 1                                     | GN=PTBP1        |
| P43487 RANG_HUMAN                                        | 6  | 6  | 0.75286 | 1.100 | R10W | WT   | Ran-specific GTPase-activating protein                                     | GN=RANBP1       |
| O60884 DNJA2_HUMAN                                       | 1  | 1  | 0.75328 | 1.154 | R10W | WT   | DnaJ homolog subfamily A member 2                                          | GN=DNJA2        |
| Q99550 MPP9_HUMAN                                        | 1  | 1  | 0.75396 | 1.617 | R10W | WT   | M-phase phosphoprotein 9                                                   | GN=MPHOSPH9     |
| P01824 HV439_HUMAN                                       | 4  | 1  | 0.76077 | 1.080 | R10W | WT   | Immunoglobulin heavy variable 4-39                                         | GN=IGHV4-39     |
| O43852 CALU_HUMAN                                        | 1  | 1  | 0.76119 | 1.067 | WT   | R10W | Calumenin                                                                  | GN=CALU         |
| Q149M9 NWD1_HUMAN                                        | 1  | 1  | 0.76231 | 1.029 | R10W | WT   | NACHT domain- and WD repeat-containing protein 1                           | GN=NWD1         |
| P23528 COF1_HUMAN                                        | 6  | 6  | 0.76276 | 1.035 | R10W | WT   | Cofilin-1                                                                  | GN=CFL1         |
| Q99426 TBCB_HUMAN                                        | 2  | 2  | 0.76411 | 1.175 | WT   | R10W | Tubulin-folding cofactor B                                                 | GN=TBCB         |
| Q8NC51 PAIRB_HUMAN                                       | 1  | 1  | 0.77397 | 1.150 | R10W | WT   | Plasminogen activator inhibitor 1 RNA-binding protein                      | GN=SERBP1       |
| P63173 RL38_HUMAN                                        | 2  | 2  | 0.77871 | 1.128 | WT   | R10W | 60S ribosomal protein L38                                                  | GN=RPL38        |
| O00483 NDUA4_HUMAN                                       | 2  | 2  | 0.78232 | 1.895 | R10W | WT   | Cytochrome c oxidase subunit NDUFA4                                        | GN=NDUFA4       |
| Q14195 DPYL3_HUMAN                                       | 2  | 2  | 0.78537 | 1.072 | WT   | R10W | Dihydropyrimidinase-related protein 3                                      | GN=DPYSL3       |
| Q10587 TEF_HUMAN                                         | 1  | 1  | 0.78551 | 1.069 | WT   | R10W | Thyrotroph embryonic factor                                                | GN=TEF          |
| P30837 AL1B1_HUMAN                                       | 1  | 1  | 0.78604 | 1.133 | WT   | R10W | Aldehyde dehydrogenase X, mitochondrial                                    | GN=ALDH1B1      |
| P07900 HS90A_HUMAN                                       | 23 | 8  | 0.78794 | 1.125 | WT   | R10W | Heat shock protein HSP 90-alpha                                            | GN=HSP90AA1     |
| O75306 NDUS2_HUMAN                                       | 2  | 2  | 0.78910 | 1.075 | R10W | WT   | NADH dehydrogenase [ubiquinone] iron-sulfur protein 2, mitochondrial       | GN=NDUFS2       |
| P61247 RS3A_HUMAN                                        | 1  | 1  | 0.78998 | 1.036 | R10W | WT   | 40S ribosomal protein S3a                                                  | GN=RPS3A        |
| O60547 GMDS_HUMAN                                        | 4  | 4  | 0.79115 | 1.056 | R10W | WT   | GDP-mannose 4,6 dehydratase                                                | GN=GMDS         |
| P49327 FASN_HUMAN                                        | 4  | 4  | 0.79134 | 1.242 | R10W | WT   | Fatty acid synthase                                                        | GN=FASN         |
| O95831 AIFM1_HUMAN                                       | 1  | 1  | 0.79816 | 1.051 | R10W | WT   | Apoptosis-inducing factor 1, mitochondrial                                 | GN=AIFM1        |
| P27348 1433T_HUMAN                                       | 4  | 1  | 0.80335 | 1.041 | R10W | WT   | 14-3-3 protein theta                                                       | GN=YWHAQ        |
| Q9Y285 SYFA_HUMAN                                        | 2  | 2  | 0.80522 | 1.117 | R10W | WT   | Phenylalanine--tRNA ligase alpha subunit                                   | GN=FARSA        |
| P22087 FBRL_HUMAN                                        | 1  | 1  | 0.80730 | 1.071 | R10W | WT   | rRNA 2'-O-methyltransferase fibrillar                                      | GN=FBL          |
| Q96AB3 ISOC2_HUMAN                                       | 1  | 1  | 0.81398 | 1.028 | WT   | R10W | Isochorismatase domain-containing protein 2                                | GN=ISOC2        |
| P08238 HS90B_HUMAN                                       | 39 | 22 | 0.81561 | 1.055 | R10W | WT   | Heat shock protein HSP 90-beta                                             | GN=HSP90AB1     |
| P30101 PDIA3_HUMAN                                       | 1  | 1  | 0.81579 | 1.095 | WT   | R10W | Protein disulfide-isomerase A3                                             | GN=PDIA3        |
| P52339 DNBI_HHV7J                                        | 1  | 1  | 0.81798 | 1.364 | R10W | WT   | Major DNA-binding protein OS=Human herpesvirus 7 (strain JI)               | OX=57278 GN=DBP |
| P00367 DHE3_HUMAN                                        | 4  | 4  | 0.81800 | 1.075 | R10W | WT   | Glutamate dehydrogenase 1, mitochondrial                                   | GN=GLUD1        |
| P30048 PRDX3_HUMAN                                       | 6  | 6  | 0.82078 | 1.108 | R10W | WT   | Thioredoxin-dependent peroxide reductase, mitochondrial                    | GN=PRDX3        |
| P42167 LAP2B_HUMAN                                       | 1  | 1  | 0.82231 | 1.050 | WT   | R10W | Lamina-associated polypeptide 2, isoforms beta/gamma                       | GN=TMPO         |
| O14734 ACOT8_HUMAN                                       | 2  | 2  | 0.82451 | 1.390 | R10W | WT   | Acyl-coenzyme A thioesterase 8                                             | GN=ACOT8        |
| P62841 RS15_HUMAN                                        | 4  | 4  | 0.82631 | 1.083 | WT   | R10W | 40S ribosomal protein S15                                                  | GN=RPS15        |
| P62241 RS8_HUMAN                                         | 4  | 4  | 0.82748 | 1.014 | WT   | R10W | 40S ribosomal protein S8                                                   | GN=RPS8         |
| Q5XKP0 MIC13_HUMAN                                       | 2  | 1  | 0.83017 | 1.046 | R10W | WT   | MICOS complex subunit MIC13                                                | GN=MICOS13      |
| P02671 FIBA_HUMAN                                        | 2  | 1  | 0.83823 | 1.077 | R10W | WT   | Fibrinogen alpha chain                                                     | GN=FGA          |
| P01768 HV330_HUMAN;P0DP02 HVC33_HUMAN;P0DP03 HVC05_HUMAN | 4  | 1  | 0.84069 | 1.094 | R10W | WT   | Immunoglobulin heavy variable 3-30                                         | GN=IGHV3-30     |
| P02786 TFR1_HUMAN                                        | 1  | 1  | 0.84190 | 1.205 | R10W | WT   | Transferrin receptor protein 1                                             | GN=TFRC         |
| P62081 RS7_HUMAN                                         | 4  | 4  | 0.84547 | 1.077 | R10W | WT   | 40S ribosomal protein S7                                                   | GN=RPS7         |
| A7E2V4 ZSWM8_HUMAN                                       | 1  | 1  | 0.84552 | 1.125 | WT   | R10W | Zinc finger SWIM domain-containing protein 8                               | GN=ZSWIM8       |
| P03243 E1B55_ADE05                                       | 6  | 6  | 0.84590 | 1.052 | R10W | WT   | E1B 55 kDa protein OS=Human adenovirus C serotype 5                        | OX=28285        |

|                                                     |    |    |         |       |      |      |                                                                                                 |
|-----------------------------------------------------|----|----|---------|-------|------|------|-------------------------------------------------------------------------------------------------|
| P30153 2AAA_HUMAN                                   | 2  | 2  | 0.84634 | 1.132 | WT   | R10W | Serine/threonine-protein phosphatase 2A 65 kDa regulatory subunit A alpha isoform<br>GN=PPP2R1A |
| P23396 RS3_HUMAN                                    | 6  | 6  | 0.84726 | 1.015 | WT   | R10W | 40S ribosomal protein S3 GN=RPS3                                                                |
| P63241 IF5A1_HUMAN                                  | 13 | 13 | 0.84728 | 1.029 | R10W | WT   | Eukaryotic translation initiation factor 5A-1 GN=EIF5A                                          |
| P06733 ENOA_HUMAN                                   | 21 | 15 | 0.85283 | 1.014 | WT   | R10W | Alpha-enolase GN=ENO1                                                                           |
| Q9HCN8 SDF2L_HUMAN                                  | 1  | 1  | 0.85470 | 1.116 | WT   | R10W | Stromal cell-derived factor 2-like protein 1 GN=SDF2L1                                          |
| P04264 K2C1_HUMAN                                   | 16 | 11 | 0.85477 | 2.367 | WT   | R10W | Keratin, type II cytoskeletal 1 GN=KRT1                                                         |
| P13639 EF2_HUMAN                                    | 30 | 29 | 0.85555 | 1.026 | R10W | WT   | Elongation factor 2 GN=EEF2                                                                     |
| P25205 MCM3_HUMAN                                   | 1  | 1  | 0.85682 | 1.032 | WT   | R10W | DNA replication licensing factor MCM3 GN=MCM3                                                   |
| P18621 RL17_HUMAN                                   | 2  | 2  | 0.86048 | 1.019 | WT   | R10W | 60S ribosomal protein L17 GN=RPL17                                                              |
| P46777 RL5_HUMAN                                    | 3  | 3  | 0.86109 | 1.031 | R10W | WT   | 60S ribosomal protein L5 GN=RPL5                                                                |
| P01780 HV307_HUMAN                                  | 4  | 1  | 0.86439 | 1.113 | R10W | WT   | Immunoglobulin heavy variable 3-7 GN=IGHV3-7                                                    |
| P26641 EF1G_HUMAN                                   | 10 | 10 | 0.86630 | 1.020 | R10W | WT   | Elongation factor 1-gamma GN=EEF1G                                                              |
| P60981 DEST_HUMAN                                   | 9  | 9  | 0.86867 | 1.005 | R10W | WT   | Dextrin GN=DSTN                                                                                 |
| Q9BSE5 SPEB_HUMAN                                   | 1  | 1  | 0.86882 | 1.042 | WT   | R10W | Agmatinase, mitochondrial GN=AGMAT                                                              |
| P22626 ROA2_HUMAN                                   | 2  | 2  | 0.87549 | 1.008 | R10W | WT   | Heterogeneous nuclear ribonucleoproteins A2/B1 GN=HNRNPA2B1                                     |
| P04075 ALDOA_HUMAN                                  | 1  | 1  | 0.88139 | 1.118 | R10W | WT   | Fructose-bisphosphate aldolase A GN=ALDOA                                                       |
| Q9H857 NT5D2_HUMAN                                  | 2  | 2  | 0.88141 | 1.039 | WT   | R10W | 5'-nucleotidase domain-containing protein 2 GN=NT5DC2                                           |
| P19338 NUCL_HUMAN                                   | 20 | 20 | 0.88237 | 1.021 | R10W | WT   | Nucleolin GN=NCL                                                                                |
| P30533 AMRP_HUMAN                                   | 2  | 2  | 0.88435 | 1.016 | R10W | WT   | Alpha-2-macroglobulin receptor-associated protein GN=LRPAP1                                     |
| P14625 ENPL_HUMAN                                   | 3  | 2  | 0.88681 | 1.155 | R10W | WT   | Endoplasmic reticulum chaperone protein GN=HSP90B1                                              |
| P16615 AT2A2_HUMAN                                  | 6  | 6  | 0.88776 | 1.145 | R10W | WT   | Sarcoplasmic/endoplasmic reticulum calcium ATPase 2 GN=ATP2A2                                   |
| P39019 RS19_HUMAN                                   | 1  | 1  | 0.88948 | 1.046 | R10W | WT   | 40S ribosomal protein S19 GN=RPS19                                                              |
| P09382 LEG1_HUMAN                                   | 1  | 1  | 0.88998 | 1.114 | WT   | R10W | Galectin-1 GN=LGALS1                                                                            |
| P27708 PYR1_HUMAN                                   | 8  | 8  | 0.89112 | 1.011 | R10W | WT   | CAD protein GN=CAD                                                                              |
| Q9BPW8 NIP51_HUMAN                                  | 1  | 1  | 0.89324 | 1.028 | WT   | R10W | Protein NipSnap homolog 1 GN=NIPSNAP1                                                           |
| P02768 ALBU_HUMAN                                   | 6  | 5  | 0.89382 | 1.102 | R10W | WT   | Albumin GN=ALB                                                                                  |
| P46776 RL27A_HUMAN                                  | 2  | 2  | 0.89699 | 1.070 | R10W | WT   | 60S ribosomal protein L27a GN=RPL27A                                                            |
| Q15645 PCH2_HUMAN                                   | 1  | 1  | 0.89969 | 1.049 | R10W | WT   | Pachytene checkpoint protein 2 homolog GN=TRIP13                                                |
| P98161 PKD1_HUMAN                                   | 1  | 1  | 0.90581 | 1.007 | WT   | R10W | Polycystin-1 GN=PKD1                                                                            |
| Q92499 DDX1_HUMAN                                   | 1  | 1  | 0.90864 | 1.142 | WT   | R10W | ATP-dependent RNA helicase DDX1 GN=DDX1                                                         |
| Q95881 TXD12_HUMAN                                  | 10 | 9  | 0.91021 | 1.013 | R10W | WT   | Thioredoxin domain-containing protein 12 GN=TXNDC12                                             |
| P55209 NP1L1_HUMAN                                  | 4  | 4  | 0.91066 | 1.044 | WT   | R10W | Nucleosome assembly protein 1-like 1 GN=NAP1L1                                                  |
| P15880 RS2_HUMAN                                    | 4  | 4  | 0.91386 | 1.001 | R10W | WT   | 40S ribosomal protein S2 GN=RPS2                                                                |
| P61353 RL27_HUMAN                                   | 1  | 1  | 0.91486 | 1.014 | WT   | R10W | 60S ribosomal protein L27 GN=RPL27                                                              |
| Q9H3K6 BOLA2_HUMAN                                  | 5  | 5  | 0.92043 | 1.012 | R10W | WT   | BolA-like protein 2 GN=BOLA2                                                                    |
| P62913 RL11_HUMAN                                   | 6  | 6  | 0.93048 | 1.019 | WT   | R10W | 60S ribosomal protein L11 GN=RPL11                                                              |
| Q9Y230 RUVB2_HUMAN                                  | 1  | 1  | 0.93591 | 1.296 | WT   | R10W | RuvB-like 2 GN=RUVBL2                                                                           |
| P05091 ALDH2_HUMAN                                  | 1  | 1  | 0.94209 | 1.015 | R10W | WT   | Aldehyde dehydrogenase, mitochondrial GN=ALDH2                                                  |
| Q92945 FUBP2_HUMAN                                  | 4  | 4  | 0.94346 | 1.034 | R10W | WT   | Far upstream element-binding protein 2 GN=KHSRP                                                 |
| Q96AG4 LRC59_HUMAN                                  | 5  | 5  | 0.94754 | 1.005 | WT   | R10W | Leucine-rich repeat-containing protein 59 GN=LRR59                                              |
| P34931 HS71L_HUMAN                                  | 56 | 1  | 0.94835 | 1.030 | WT   | R10W | Heat shock 70 kDa protein 1-like GN=HSPA1L                                                      |
| Q9BQG0 MBB1A_HUMAN                                  | 2  | 2  | 0.94846 | 1.002 | WT   | R10W | Myb-binding protein 1A GN=MYBBP1A                                                               |
| Q9Y679 AUP1_HUMAN                                   | 1  | 1  | 0.95135 | 1.030 | R10W | WT   | Ancient ubiquitous protein 1 GN=AUP1                                                            |
| P19474 RO52_HUMAN                                   | 8  | 8  | 0.95206 | 1.011 | WT   | R10W | E3 ubiquitin-protein ligase TRIM21 GN=TRIM21                                                    |
| P47914 RL29_HUMAN                                   | 3  | 3  | 0.95862 | 1.013 | R10W | WT   | 60S ribosomal protein L29 GN=RPL29                                                              |
| A0A075B6P5 KV228_HUMAN;P01615 KVD28_HUMAN           | 35 | 3  | 0.96107 | 1.068 | WT   | R10W | Immunoglobulin kappa variable 2-28 GN=IGKV2-28                                                  |
| Q13263 TIF1B_HUMAN                                  | 1  | 1  | 0.96247 | 1.009 | WT   | R10W | Transcription intermediary factor 1-beta GN=TRIM28                                              |
| Q7L592 NDUF7_HUMAN                                  | 1  | 1  | 0.96780 | 1.951 | R10W | WT   | Protein arginine methyltransferase NDUF7, mitochondrial GN=NDUF7                                |
| Q14980 XPO1_HUMAN                                   | 1  | 1  | 0.96940 | 1.016 | R10W | WT   | Exportin-1 GN=XPO1                                                                              |
| Q10567 AP1B1_HUMAN                                  | 86 | 27 | 0.96955 | 1.033 | R10W | WT   | AP-1 complex subunit beta-1 GN=AP1B1                                                            |
| Q9BU61 NDUF3_HUMAN                                  | 1  | 1  | 0.97376 | 1.028 | WT   | R10W | NADH dehydrogenase [ubiquinone] 1 alpha subcomplex assembly factor 3 GN=NDUF3                   |
| A0A0A0MRZ9 LV552_HUMAN                              | 2  | 1  | 0.97483 | 1.011 | R10W | WT   | Immunoglobulin lambda variable 5-52 GN=IGLV5-52                                                 |
| P68431 H31_HUMAN;Q16695 H31T_HUMAN;Q71DI3 H32_HUMAN | 4  | 4  | 0.97956 | 1.203 | WT   | R10W | Histone H3.1 GN=H3C1                                                                            |
| Q9UBC2 EP15R_HUMAN                                  | 31 | 30 | 0.98048 | 1.102 | R10W | WT   | Epidermal growth factor receptor substrate 15-like 1 GN=EPS15L1                                 |
| Q8TB37 NUBPL_HUMAN                                  | 1  | 1  | 0.98287 | 1.045 | WT   | R10W | Iron-sulfur protein NUBPL GN=NUBPL                                                              |
| Q04837 SSBP_HUMAN                                   | 2  | 2  | 0.98487 | 1.052 | WT   | R10W | Single-stranded DNA-binding protein, mitochondrial GN=SSBP1                                     |
| P55769 NH2L1_HUMAN                                  | 1  | 1  | 0.99063 | 1.033 | R10W | WT   | NHP2-like protein 1 GN=SNU13                                                                    |
| P62826 RAN_HUMAN                                    | 4  | 4  | 0.99796 | 1.030 | WT   | R10W | GTP-binding nuclear protein Ran GN=RAN                                                          |
| P14866 HNRPL_HUMAN                                  | 1  | 1  | 0.99953 | 1.045 | R10W | WT   | Heterogeneous nuclear ribonucleoprotein L GN=HNRNPL                                             |



**Supplementary Table 3. List of AP2 $\sigma$ 2 interacting proteins.** Proteins shown in grey are significantly different ( $p < 0.05$ ) between the WT and R10W samples. NEC2 is a human herpesvirus 7 (strain JI) protein and was not included in the STRING analysis.
